# Supplementary material
Source: ML conference proceedings conference paper supplement (https://openreview.net/forum?id=HHHlpP8j5xc)

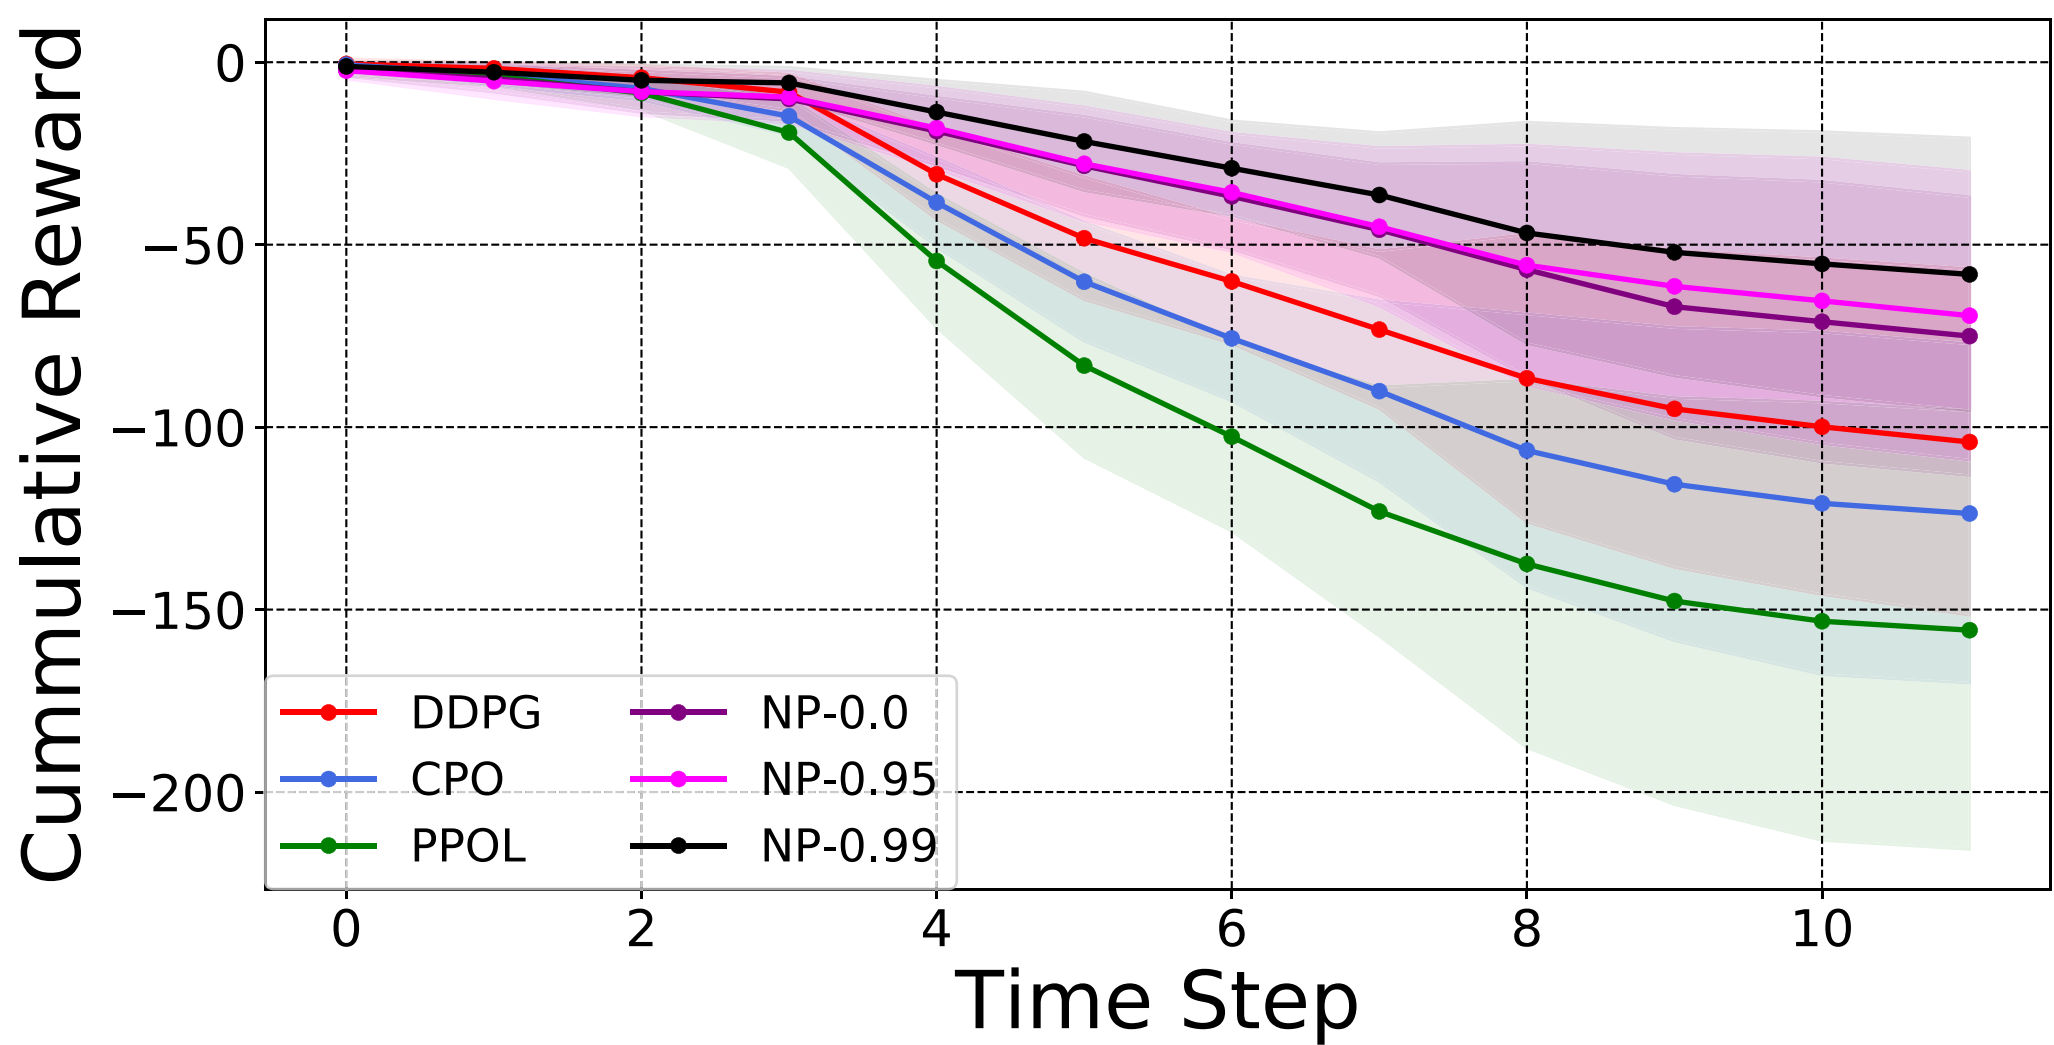

Supplement: supplementary_material [file attachment]

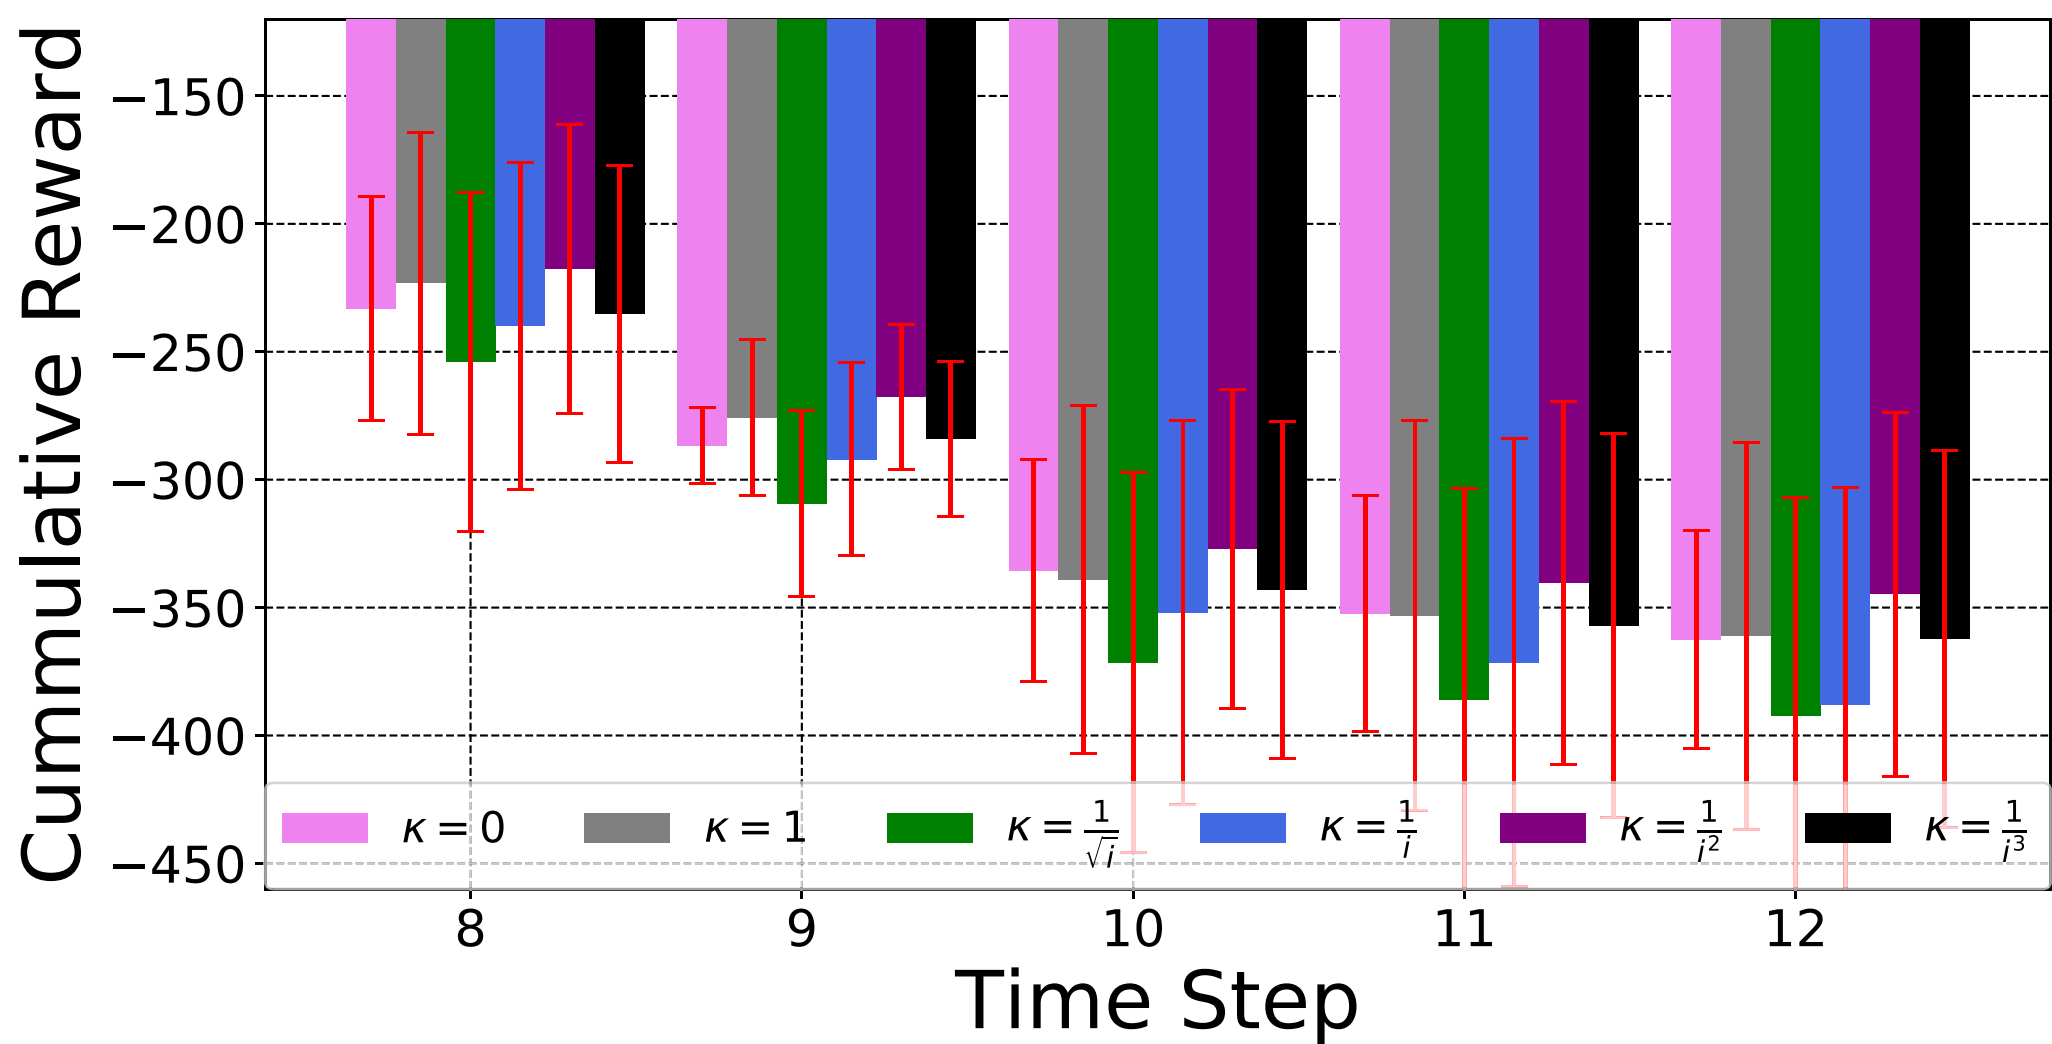

Supplement: supplementary_material [file attachment]

Cash\_Amount

Time Step

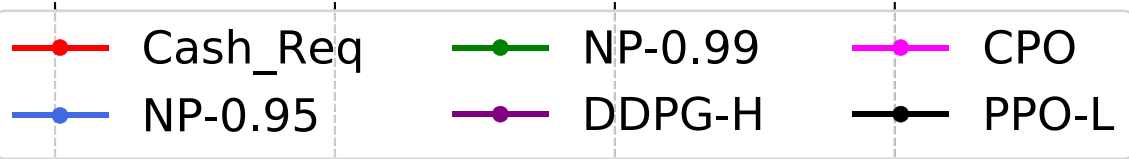

Supplement: supplementary_material [file attachment]

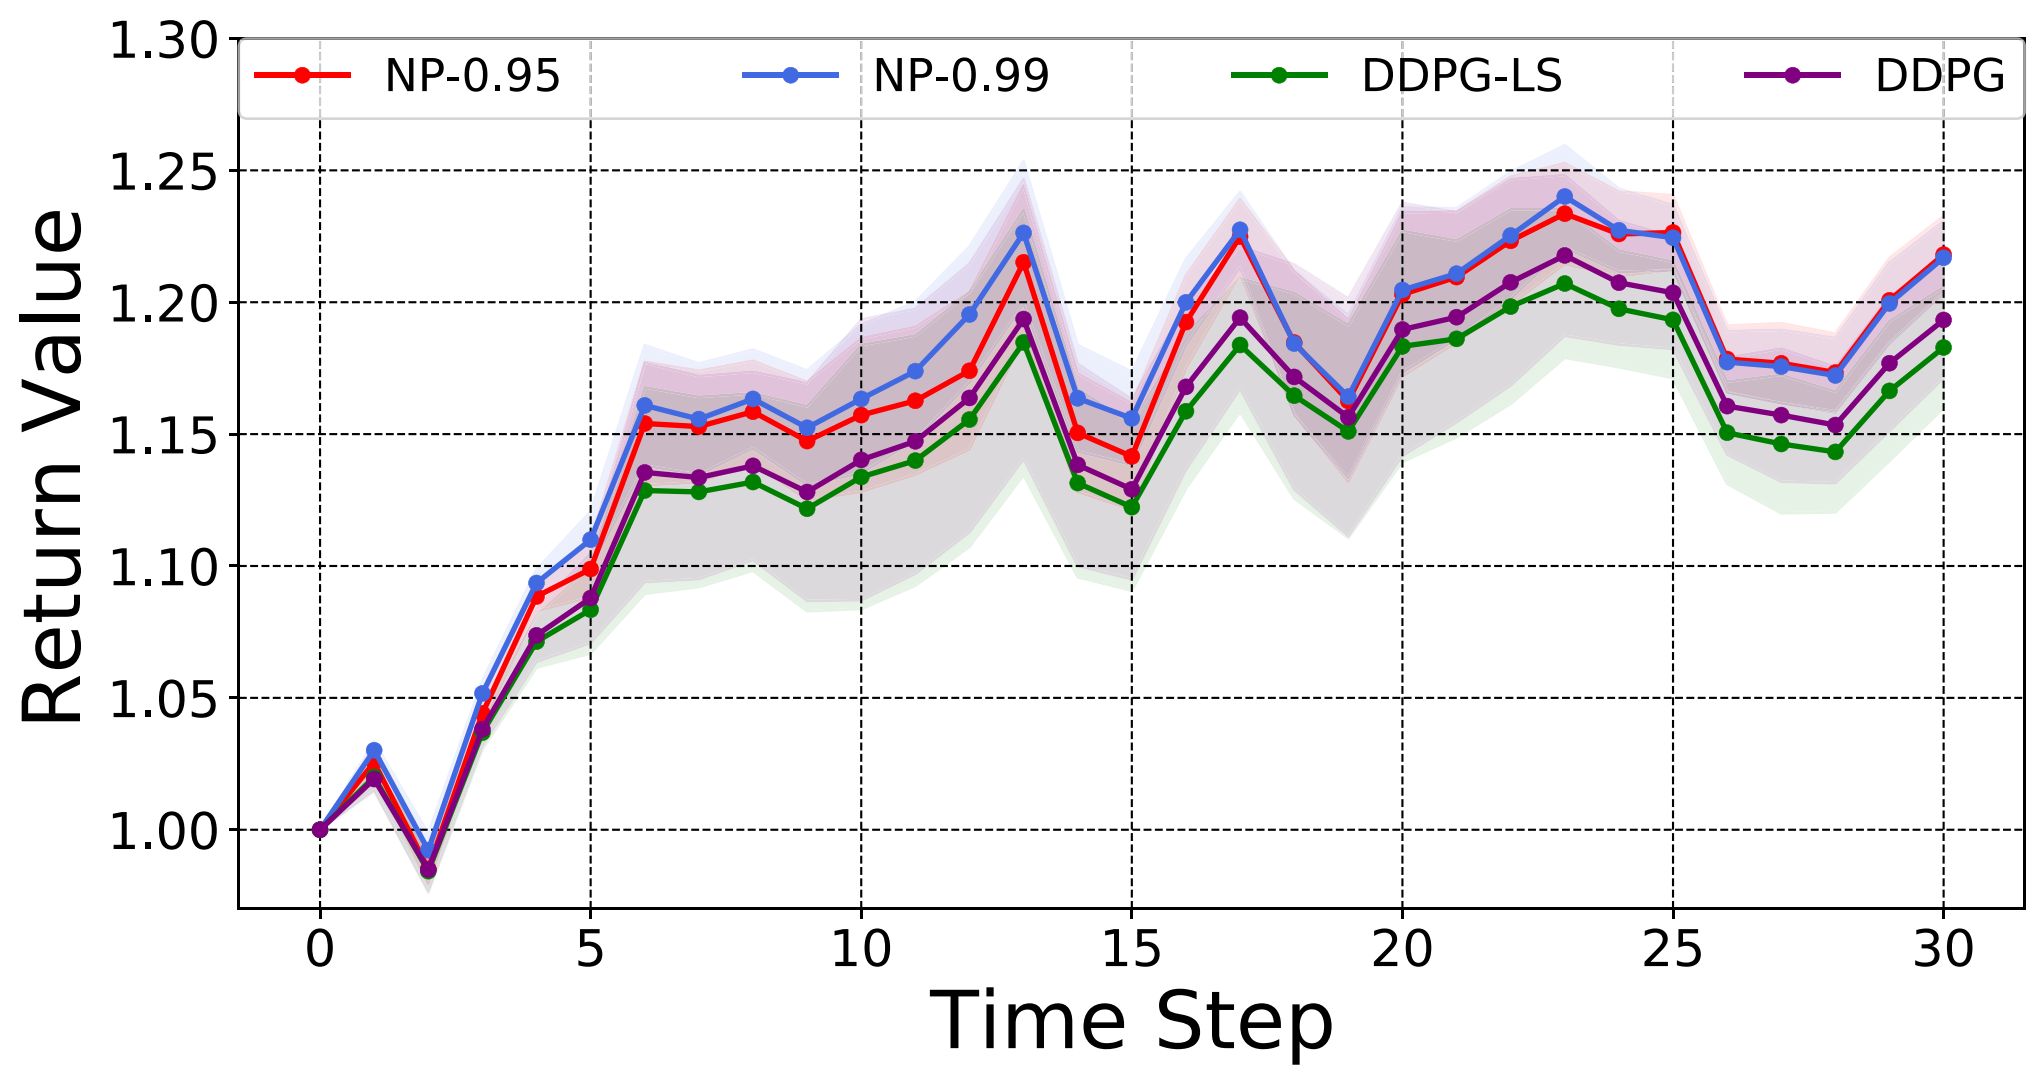

Supplement: supplementary_material [file attachment]

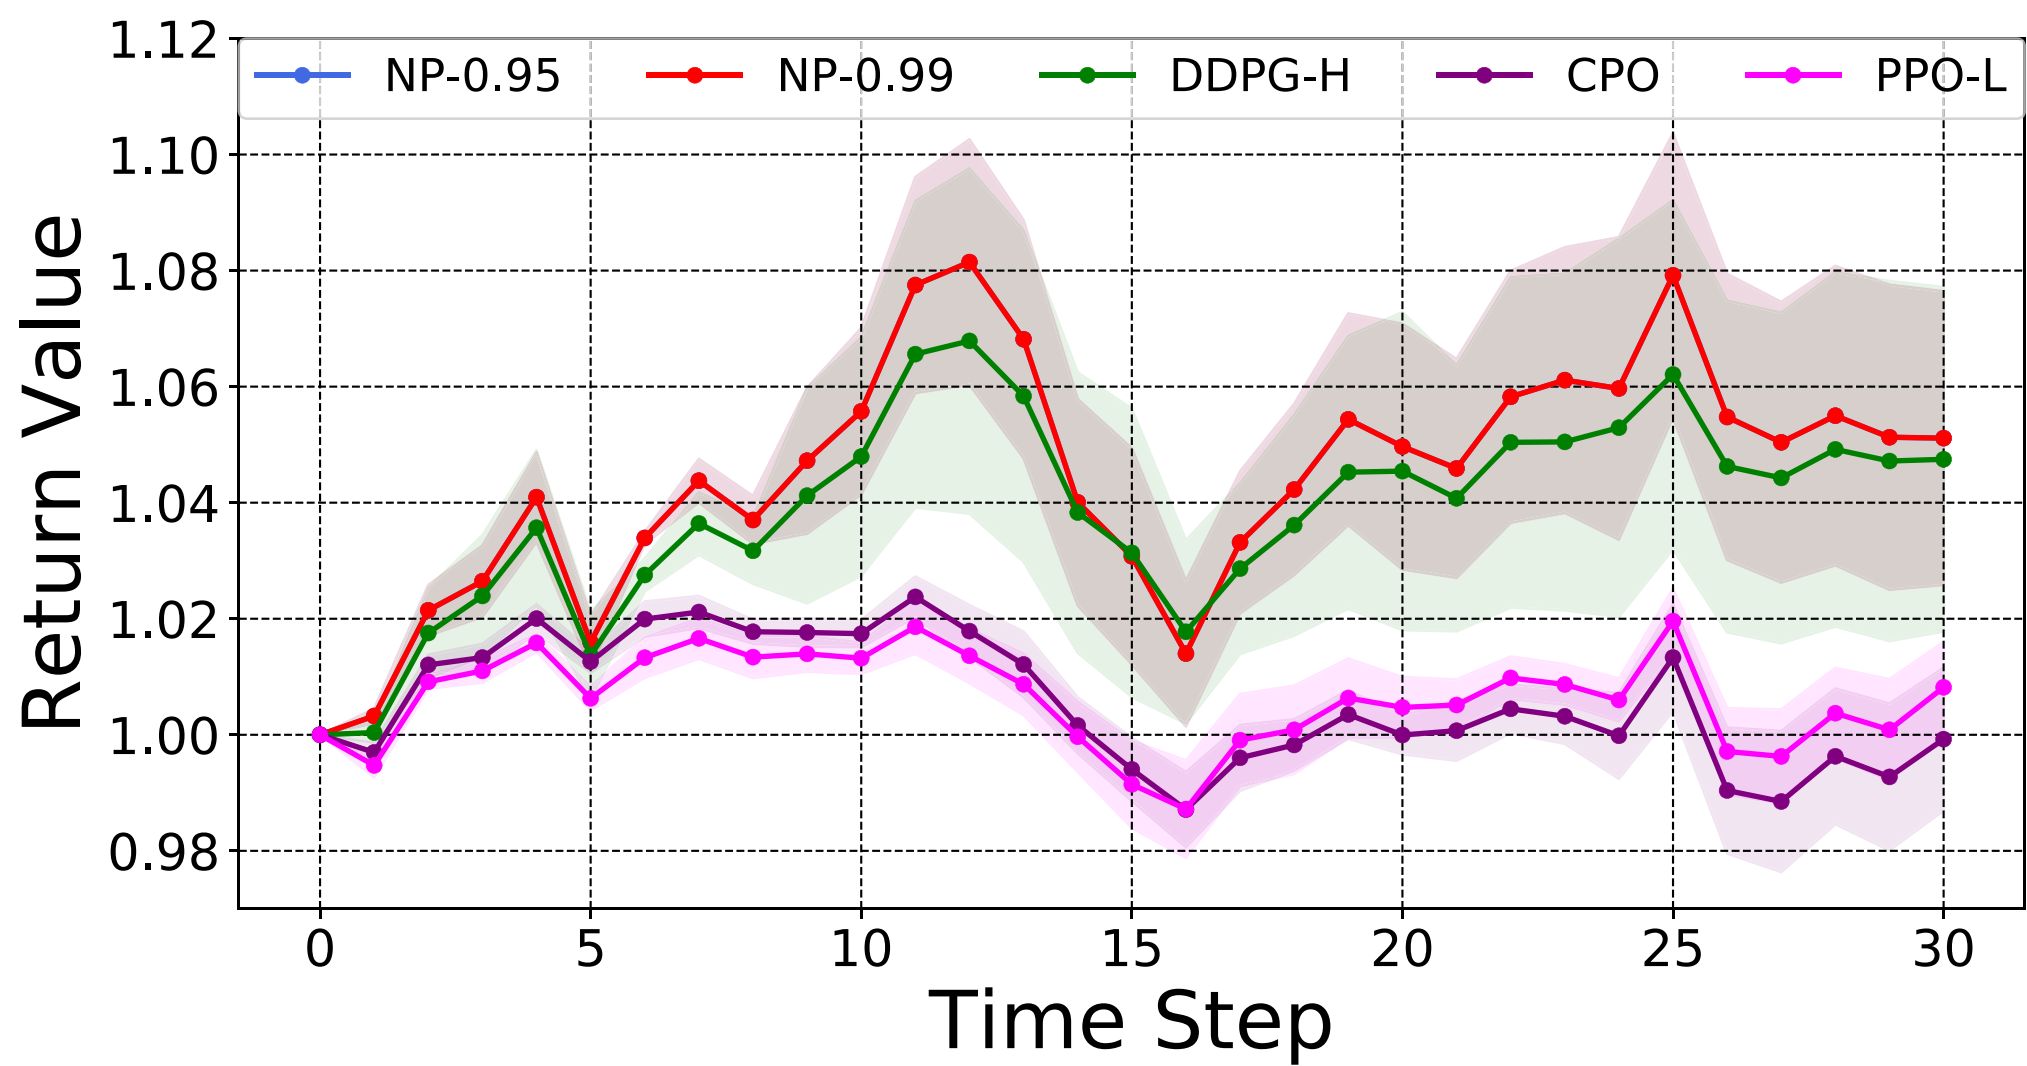

Supplement: supplementary_material [file attachment]

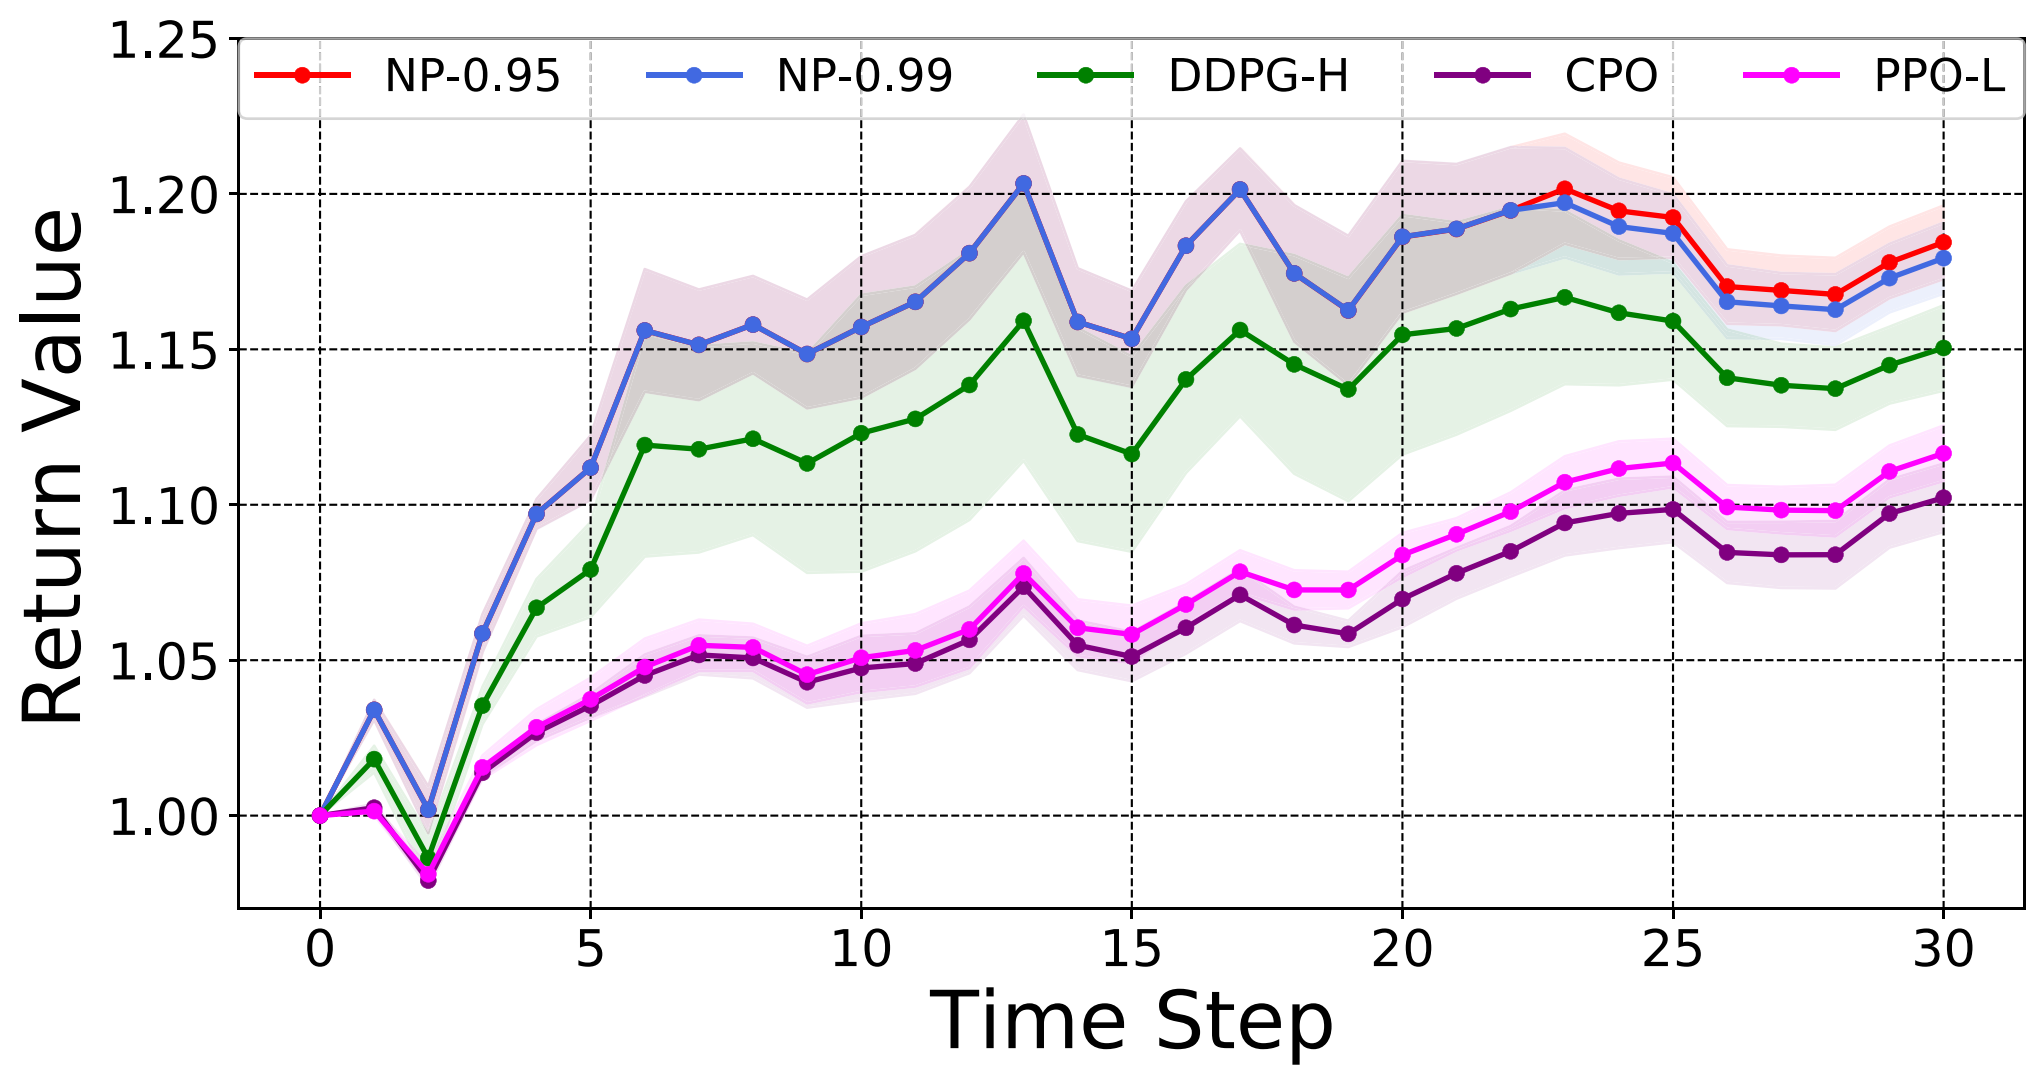

Supplement: supplementary_material [file attachment]

Cumulative Cost

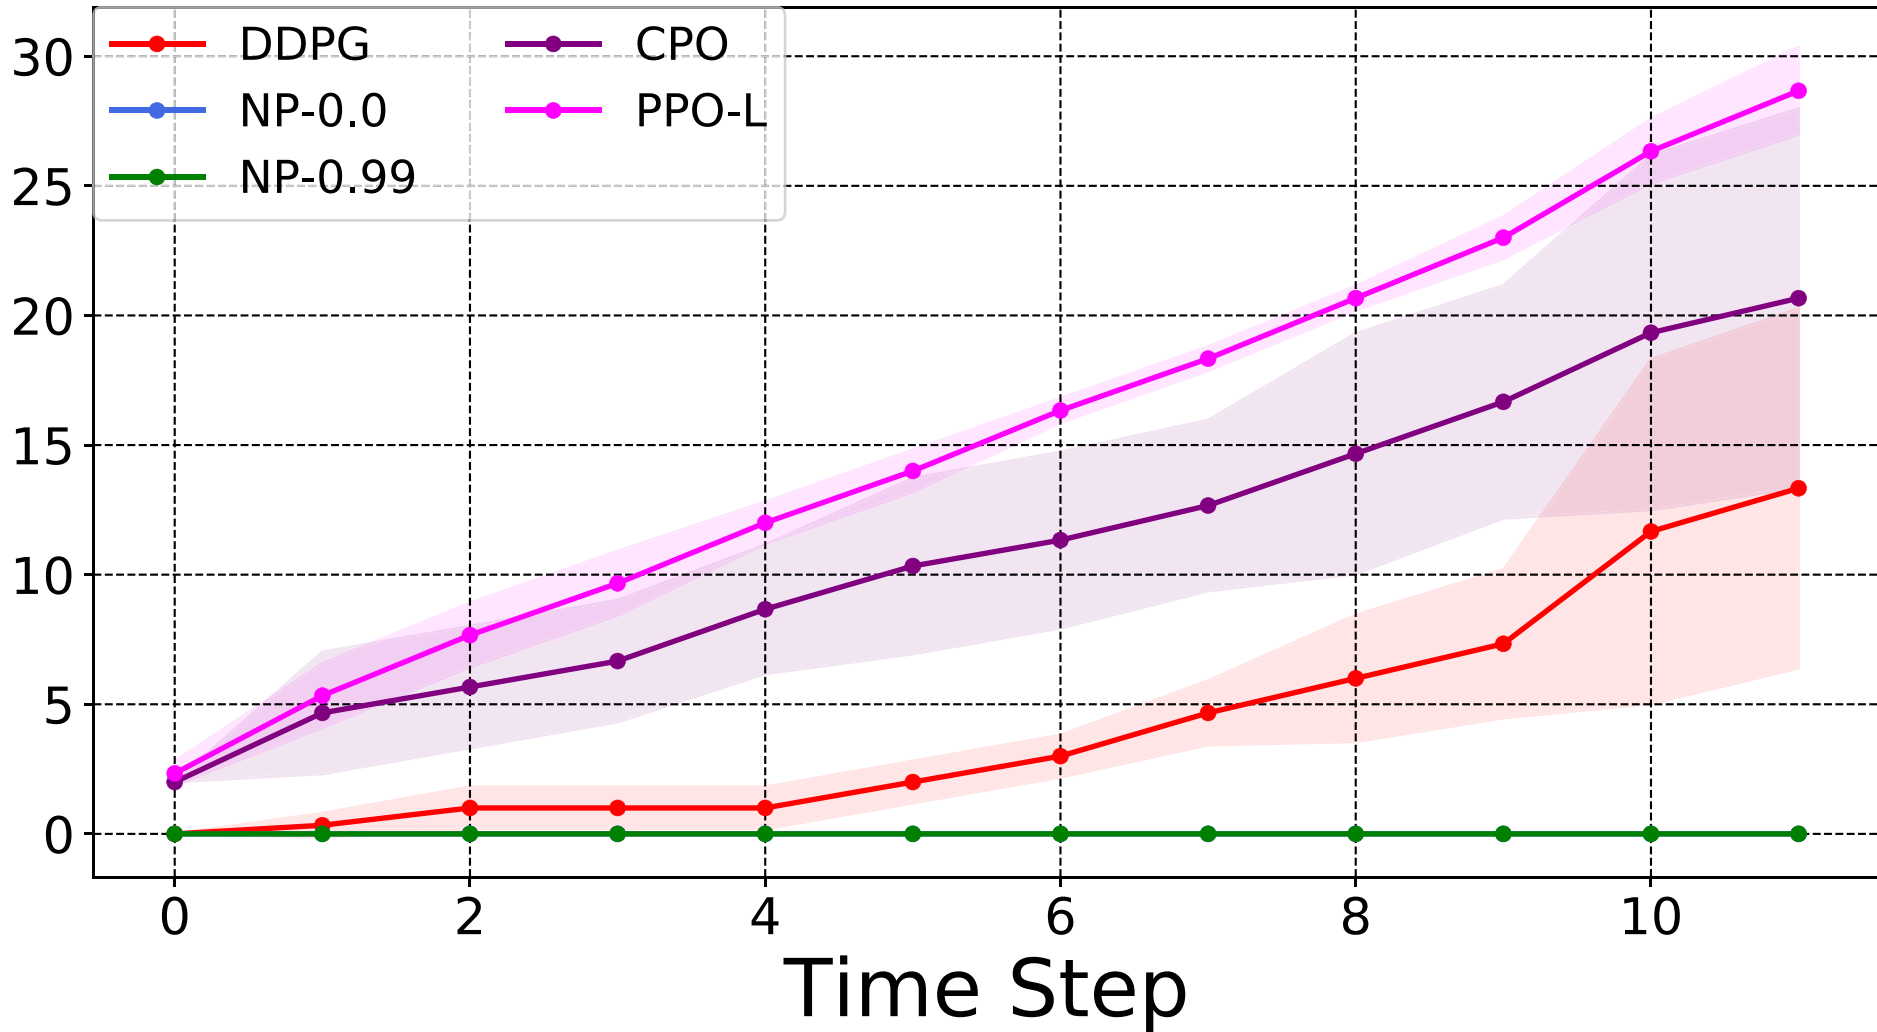

Supplement: supplementary_material [file attachment]

Cumulative Cost

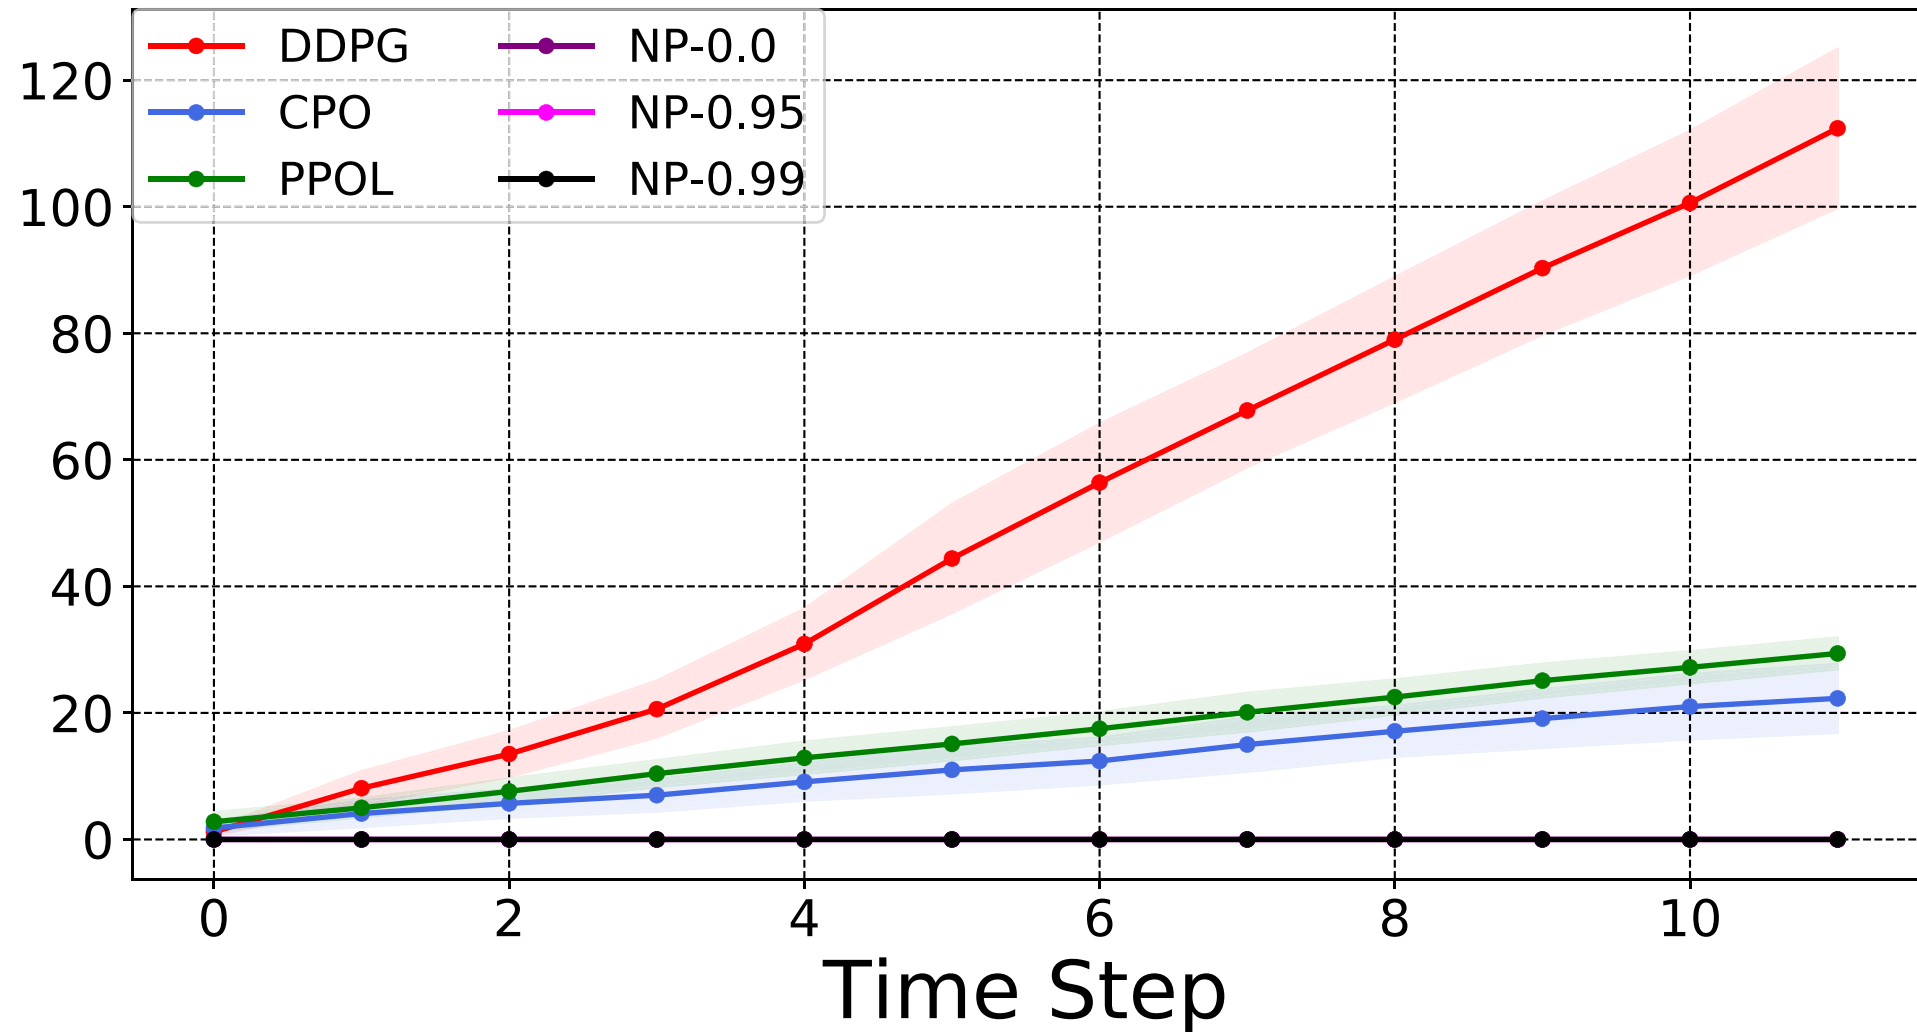

Supplement: supplementary_material [file attachment]

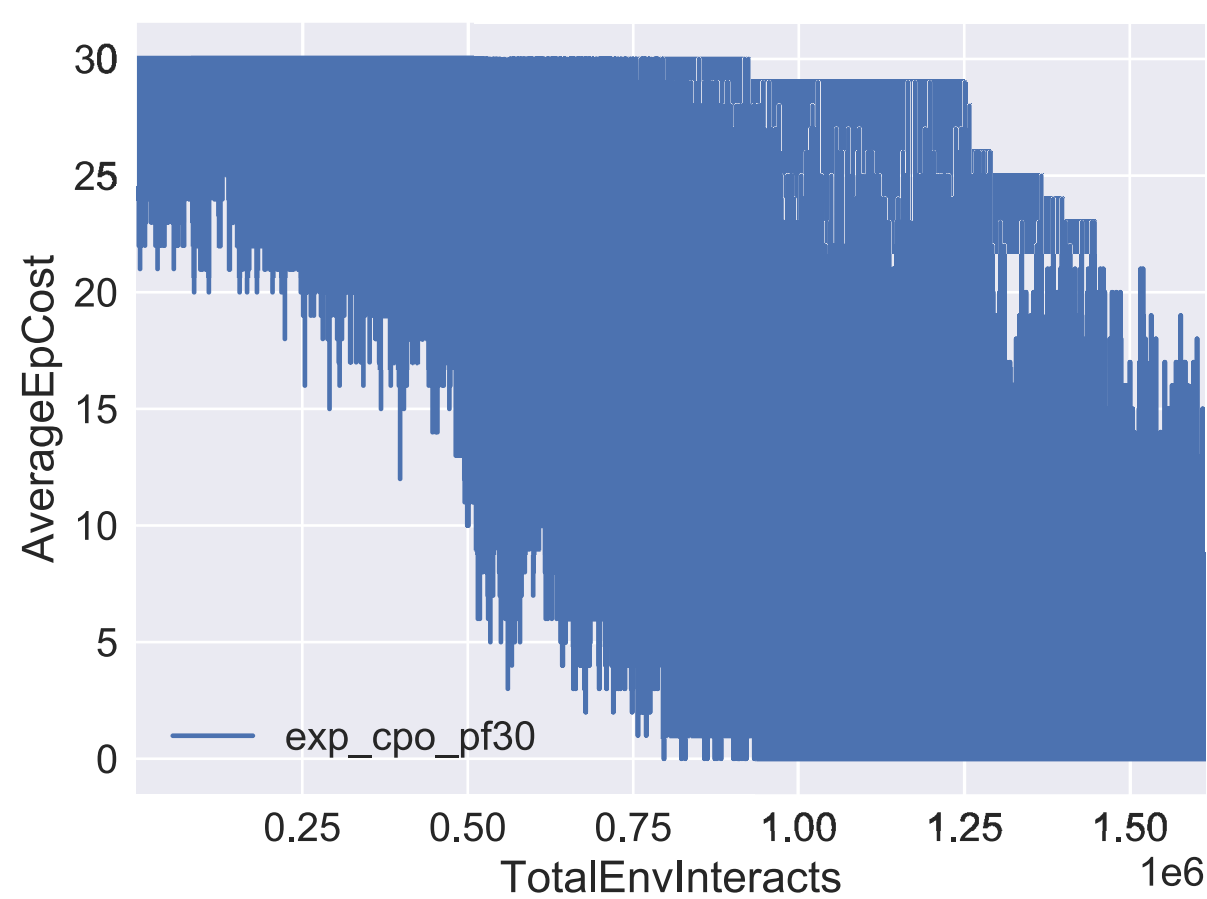

Supplement: supplementary_material [file attachment]

Return Value

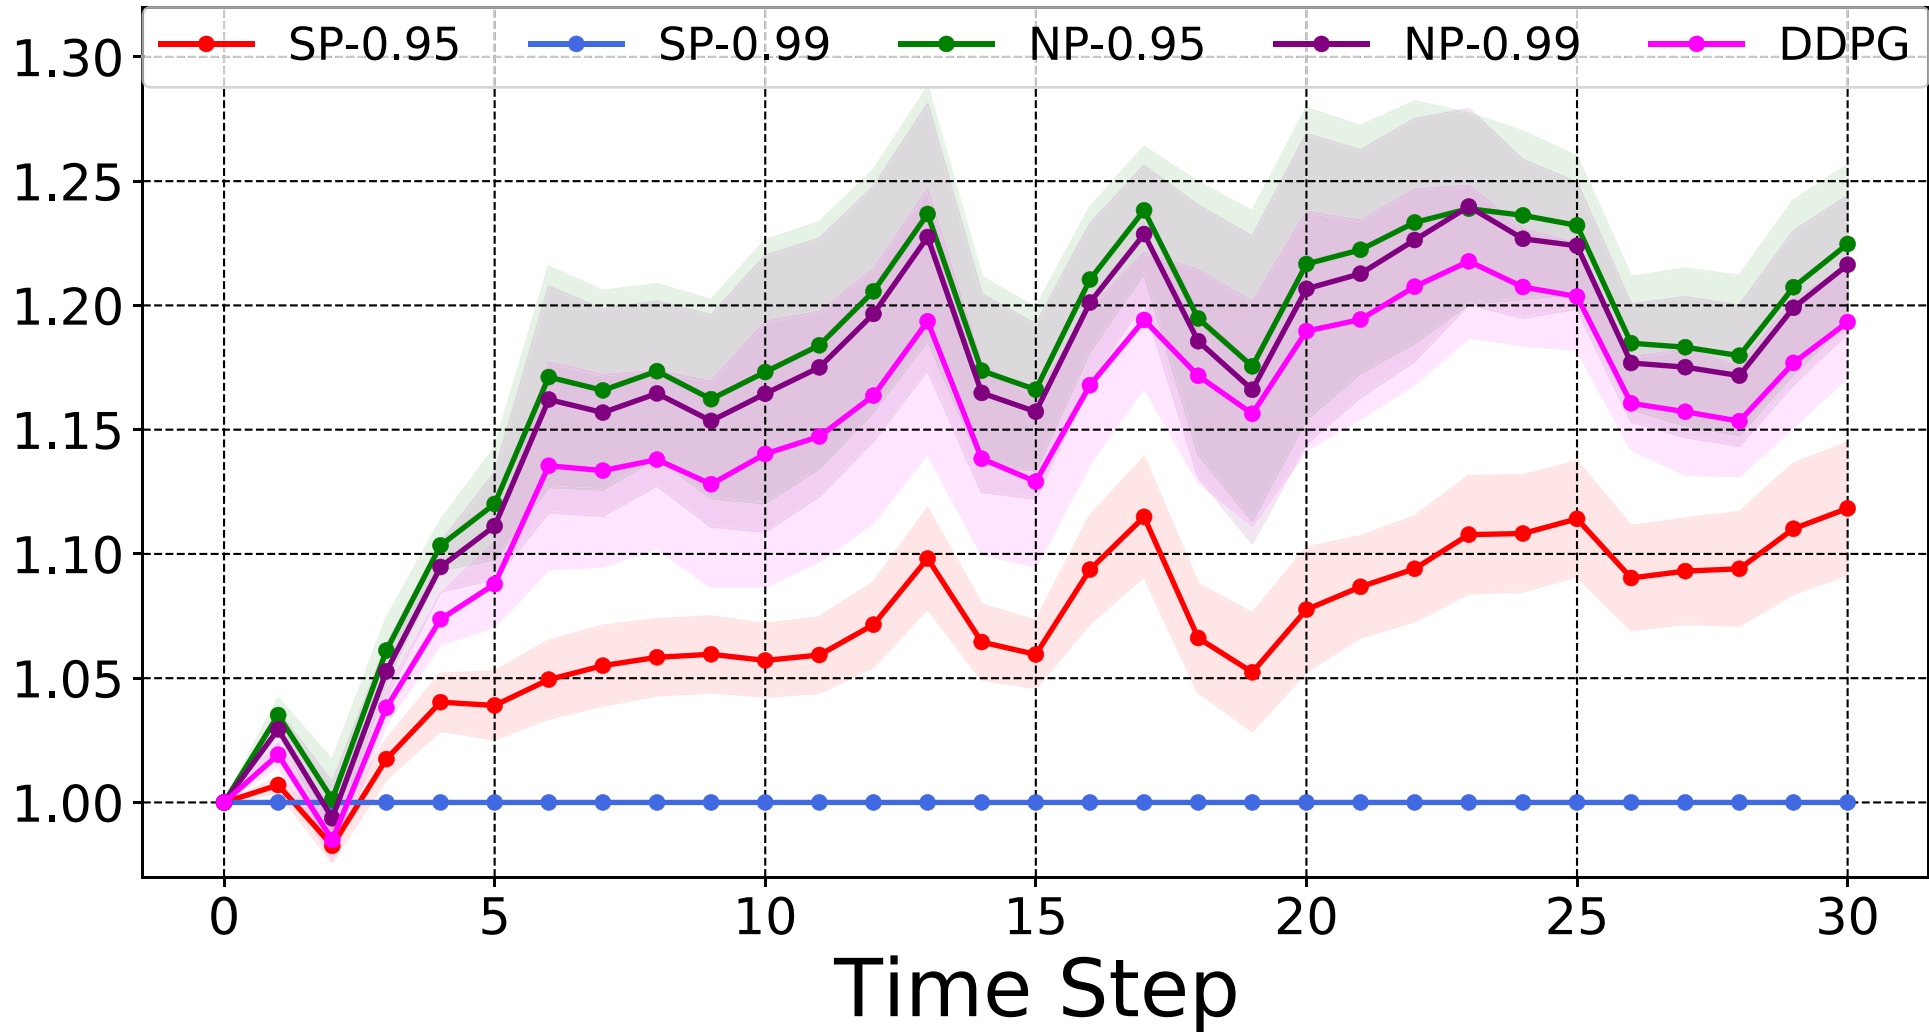

Supplement: supplementary_material [file attachment]

Return Value

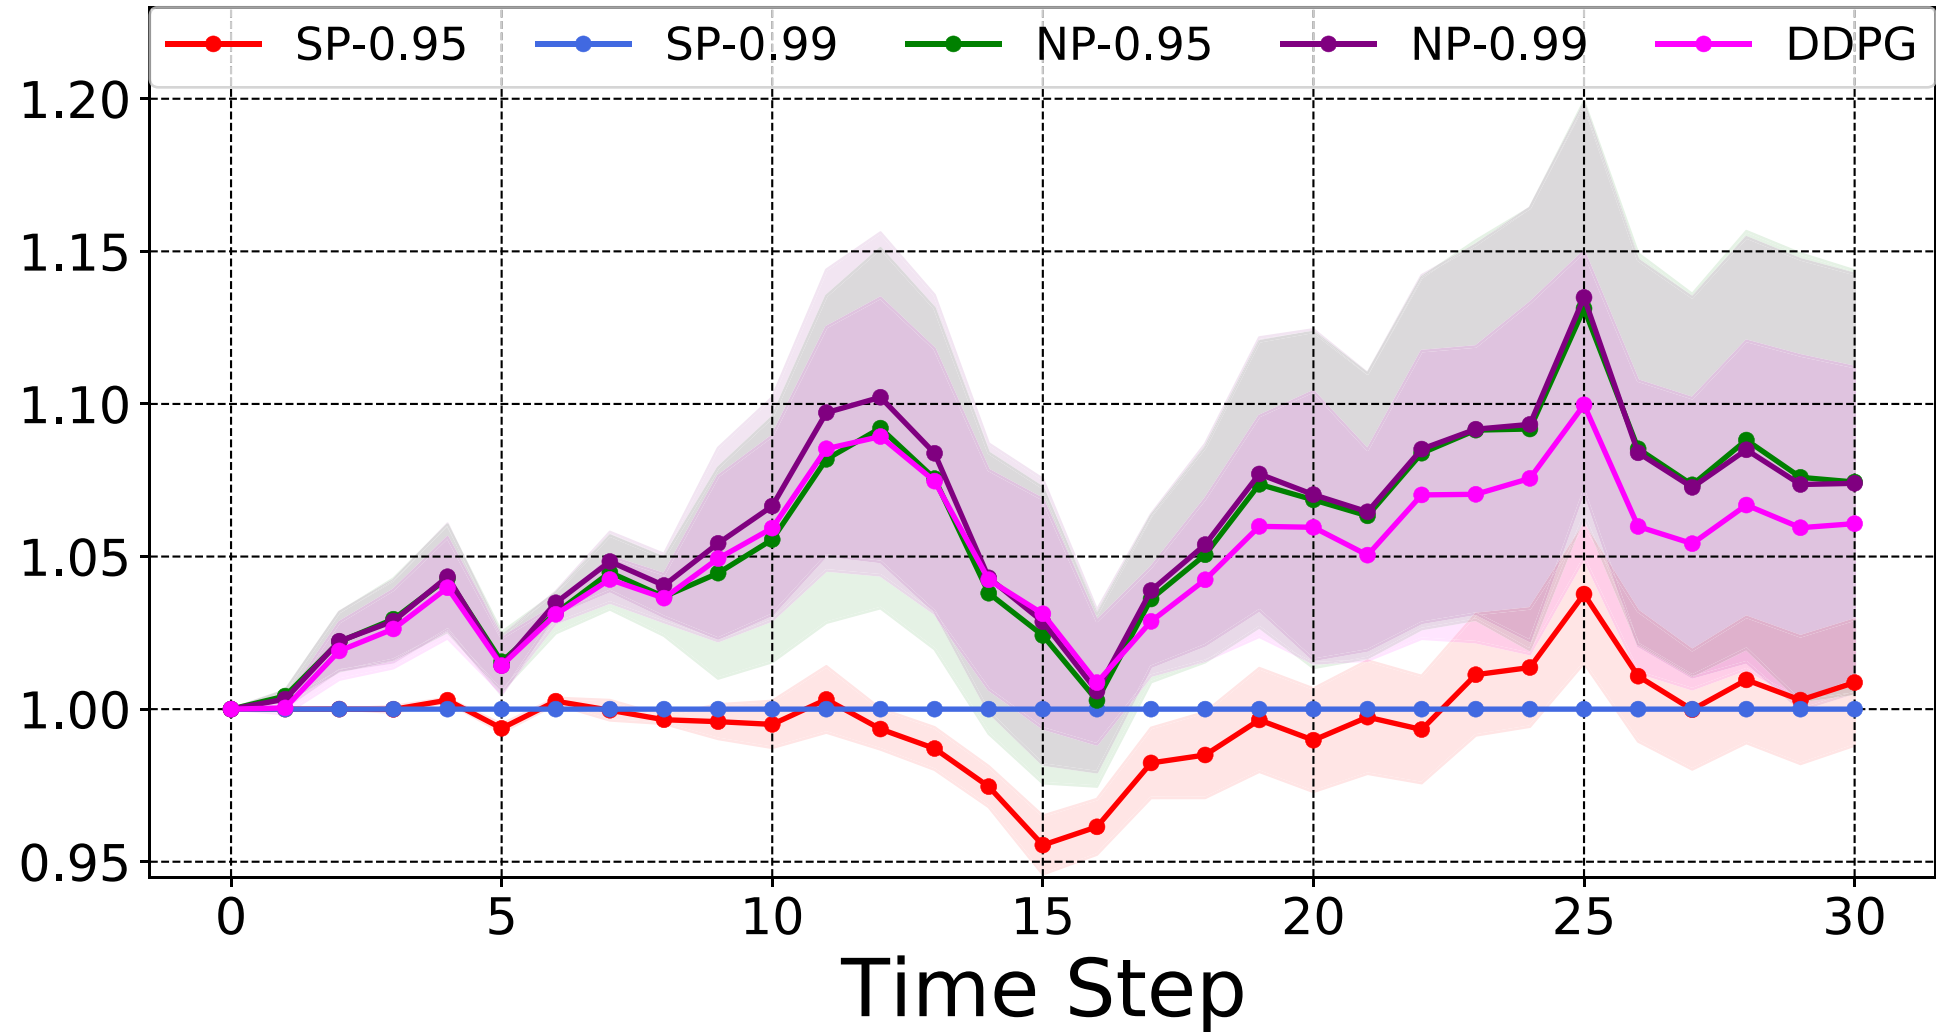

Supplement: supplementary_material [file attachment]

AverageEpCost

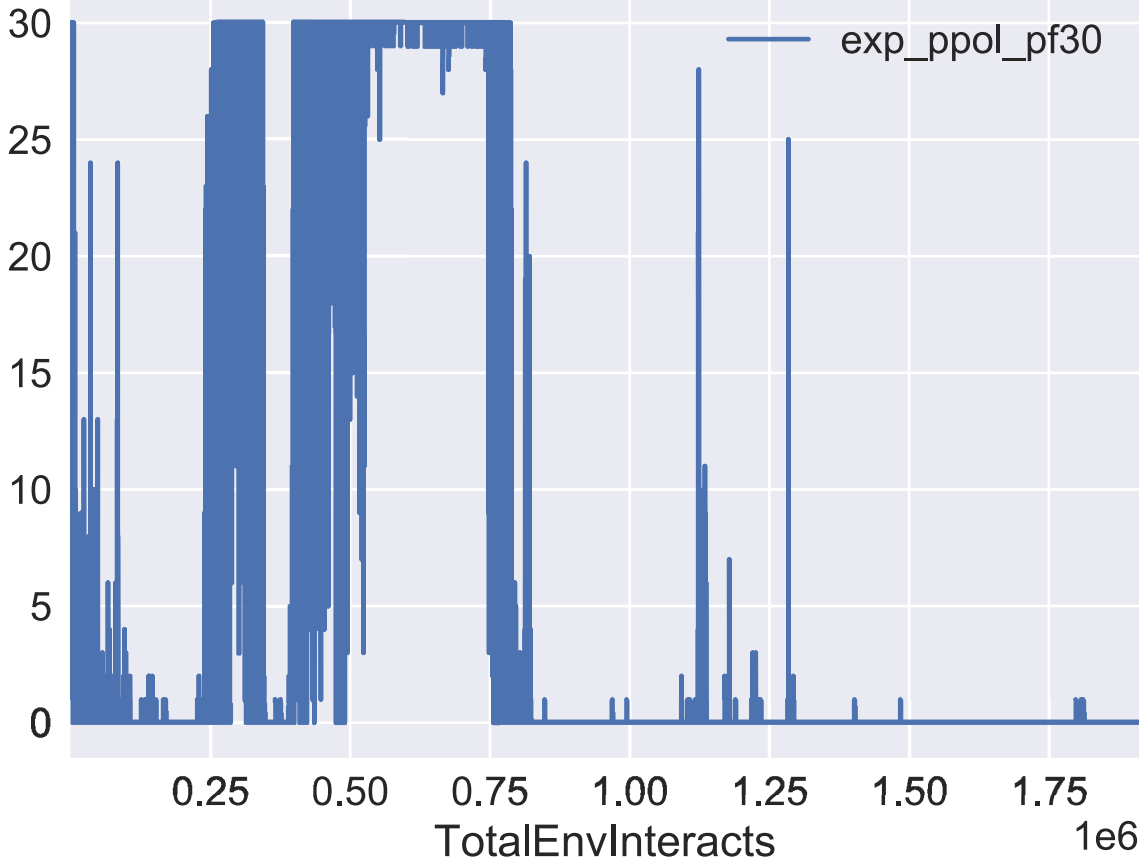

Supplement: supplementary_material [file attachment]

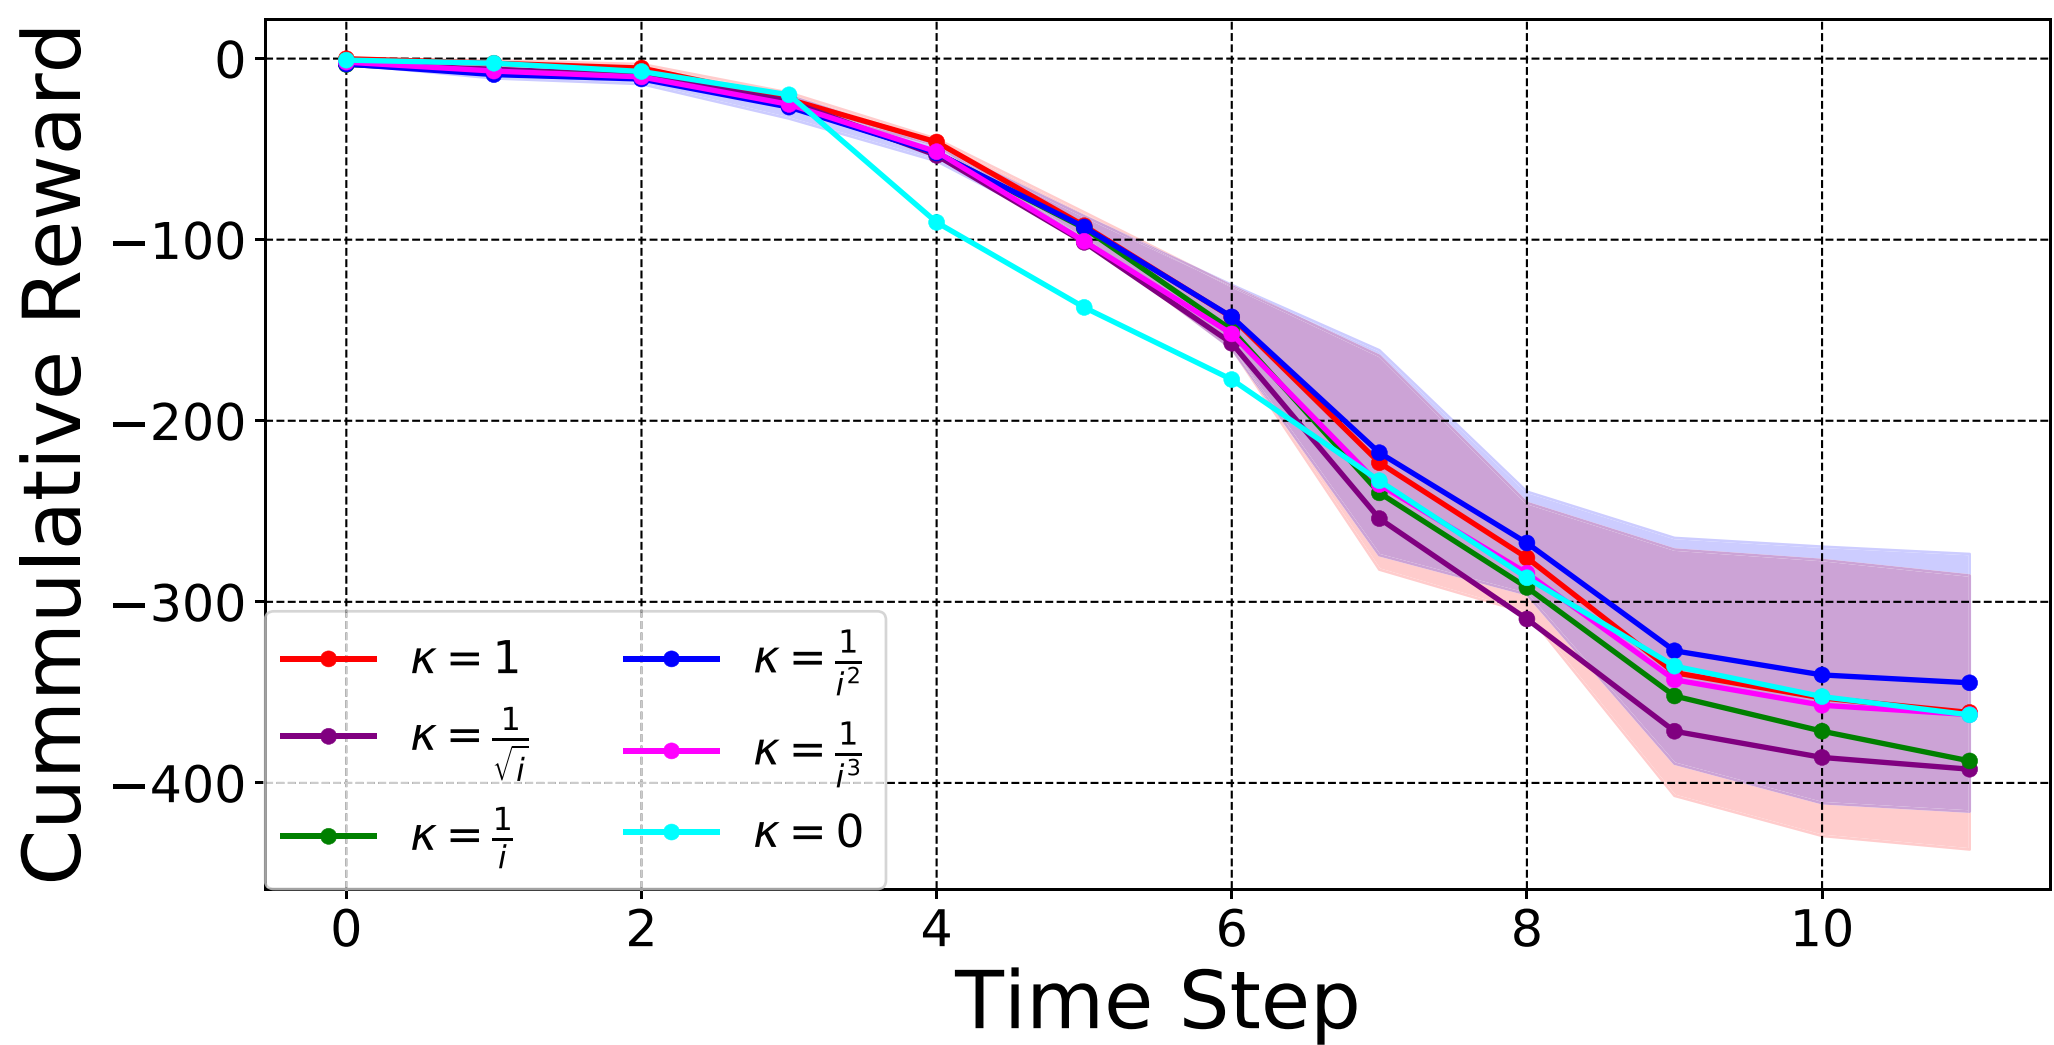

Supplement: supplementary_material [file attachment]

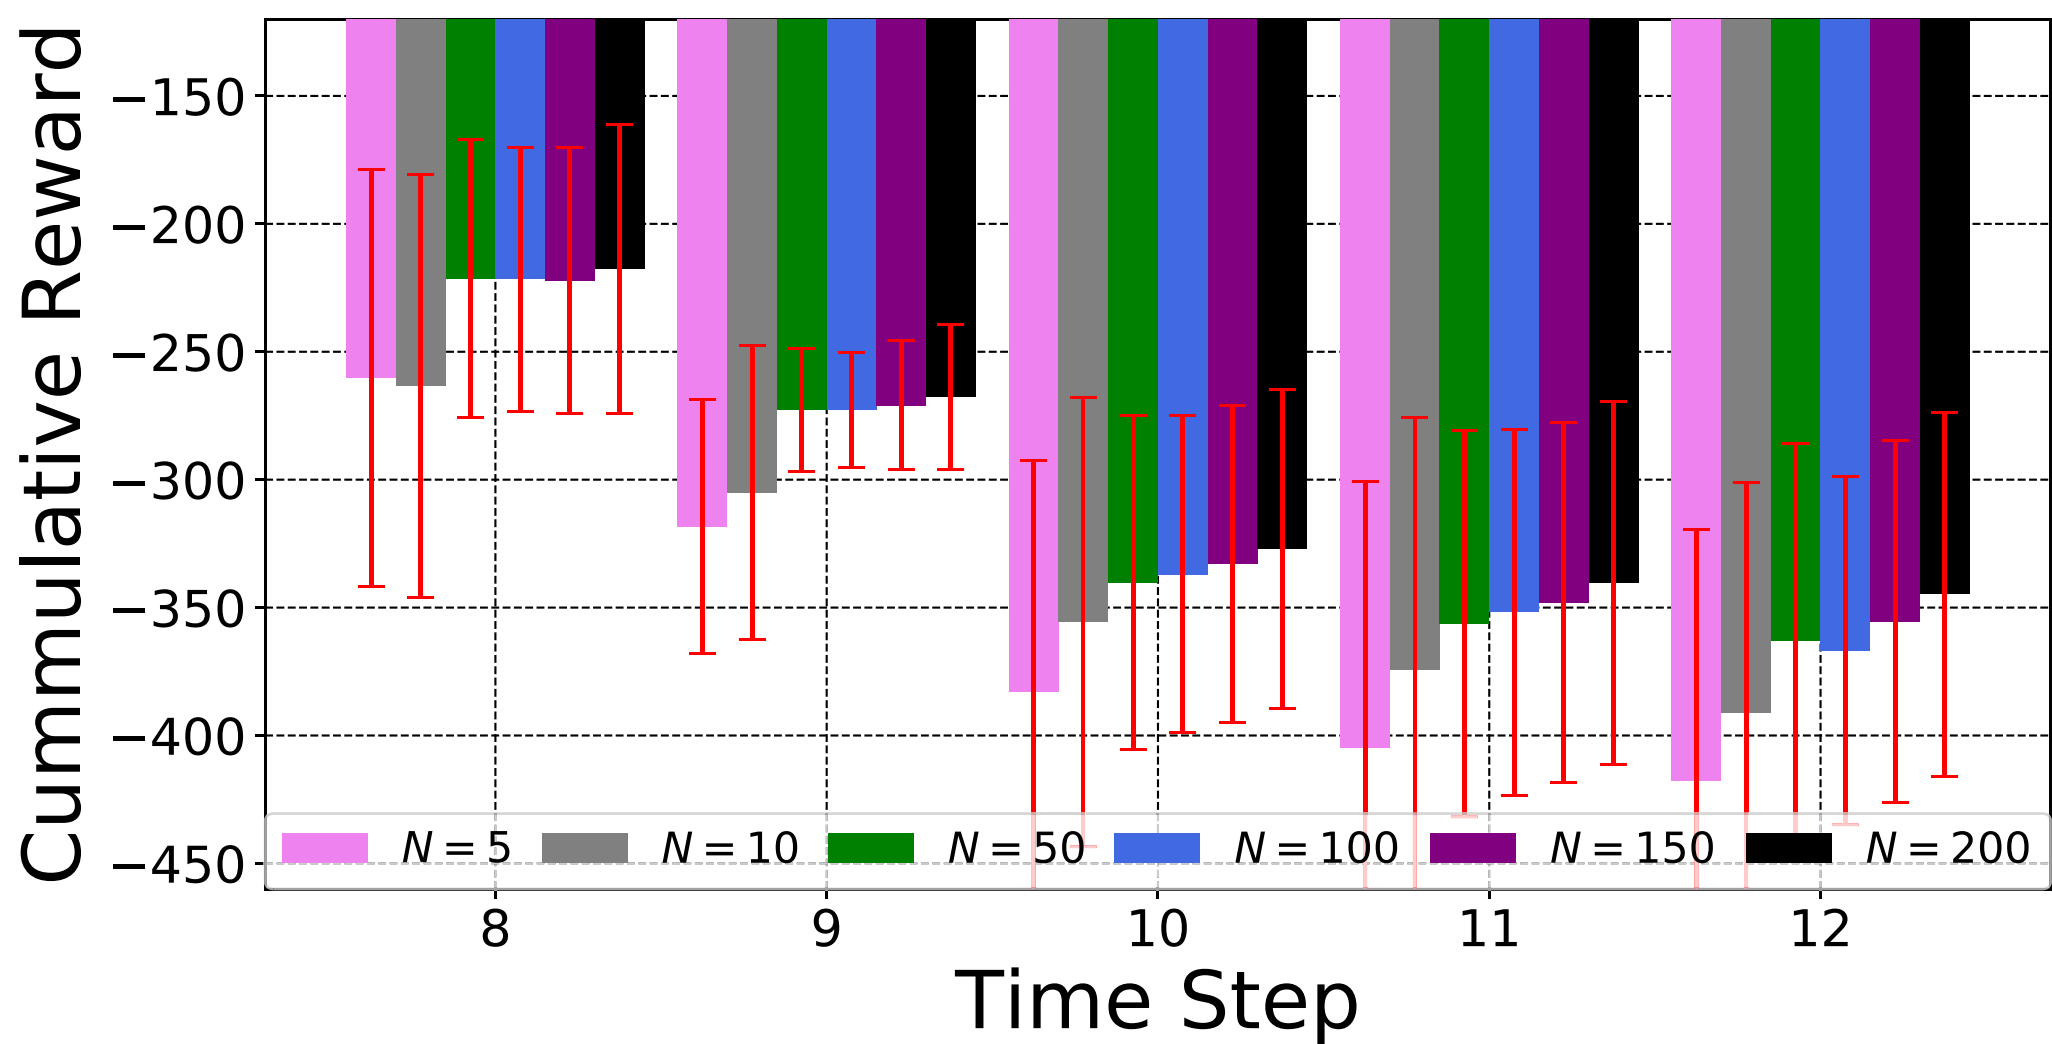

Supplement: supplementary_material [file attachment]

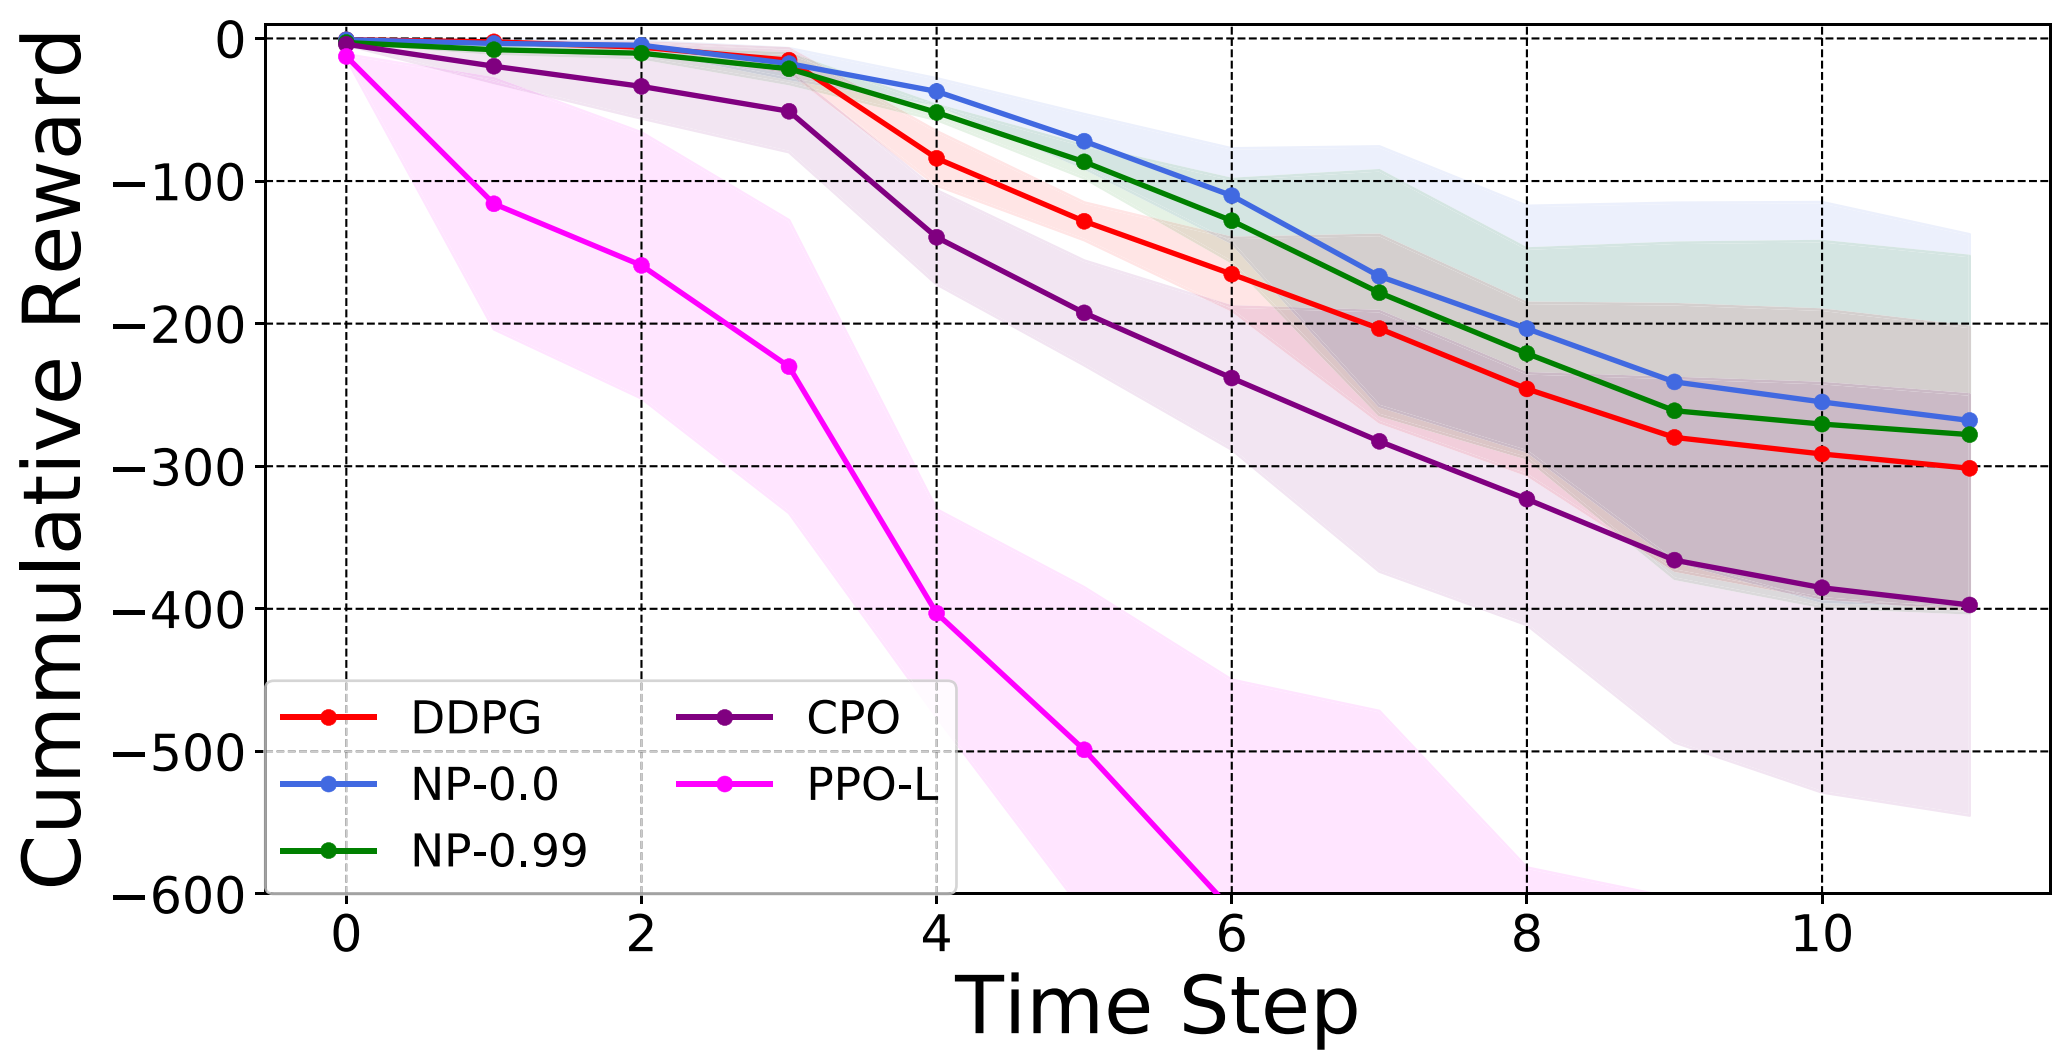

Supplement: supplementary_material [file attachment]

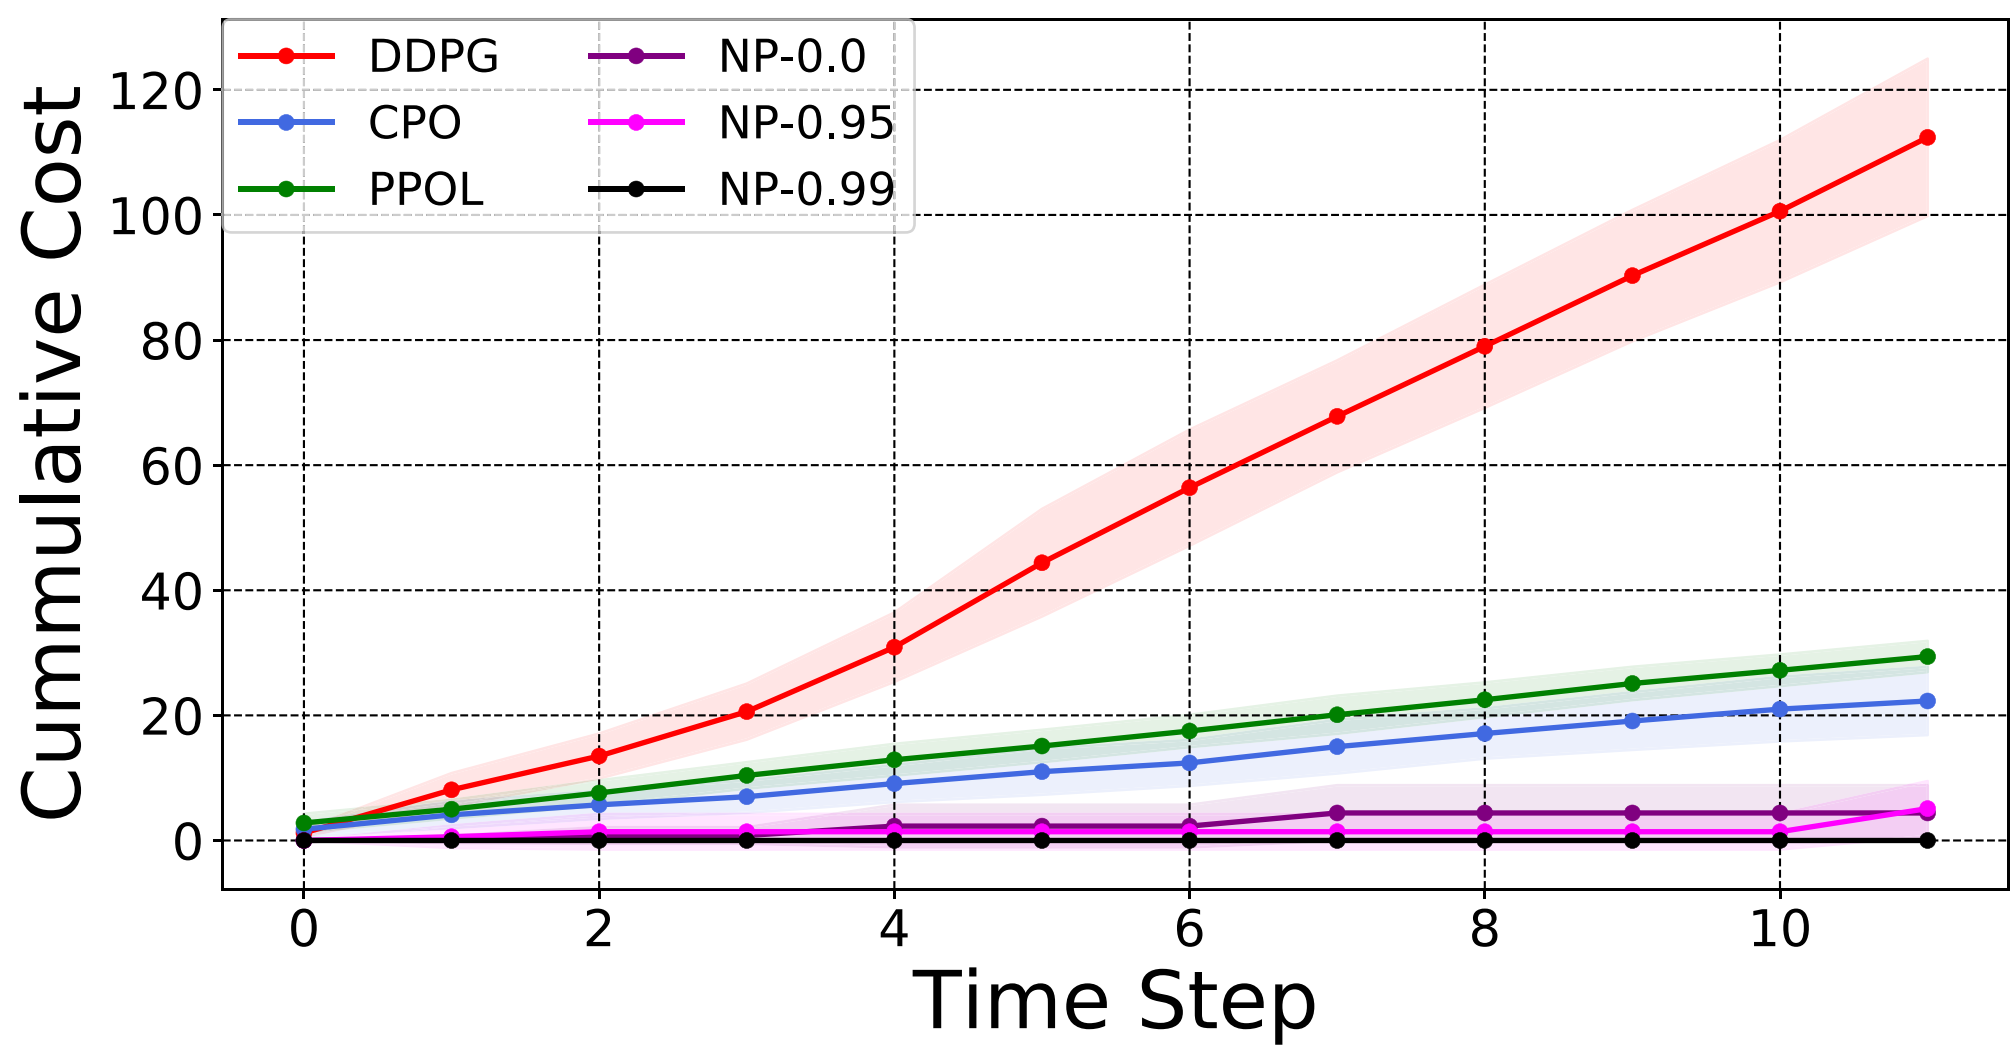

Supplement: supplementary_material [file attachment]

Cash\_Amount

Time Step

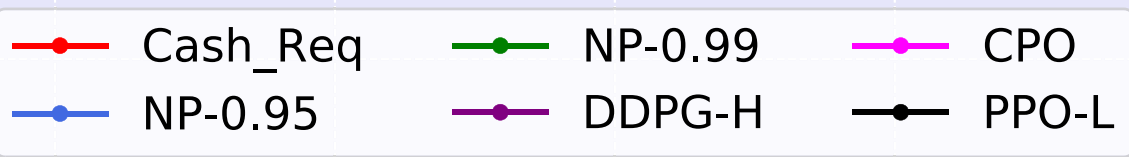

Supplement: supplementary_material [file attachment]

Optimality Gap

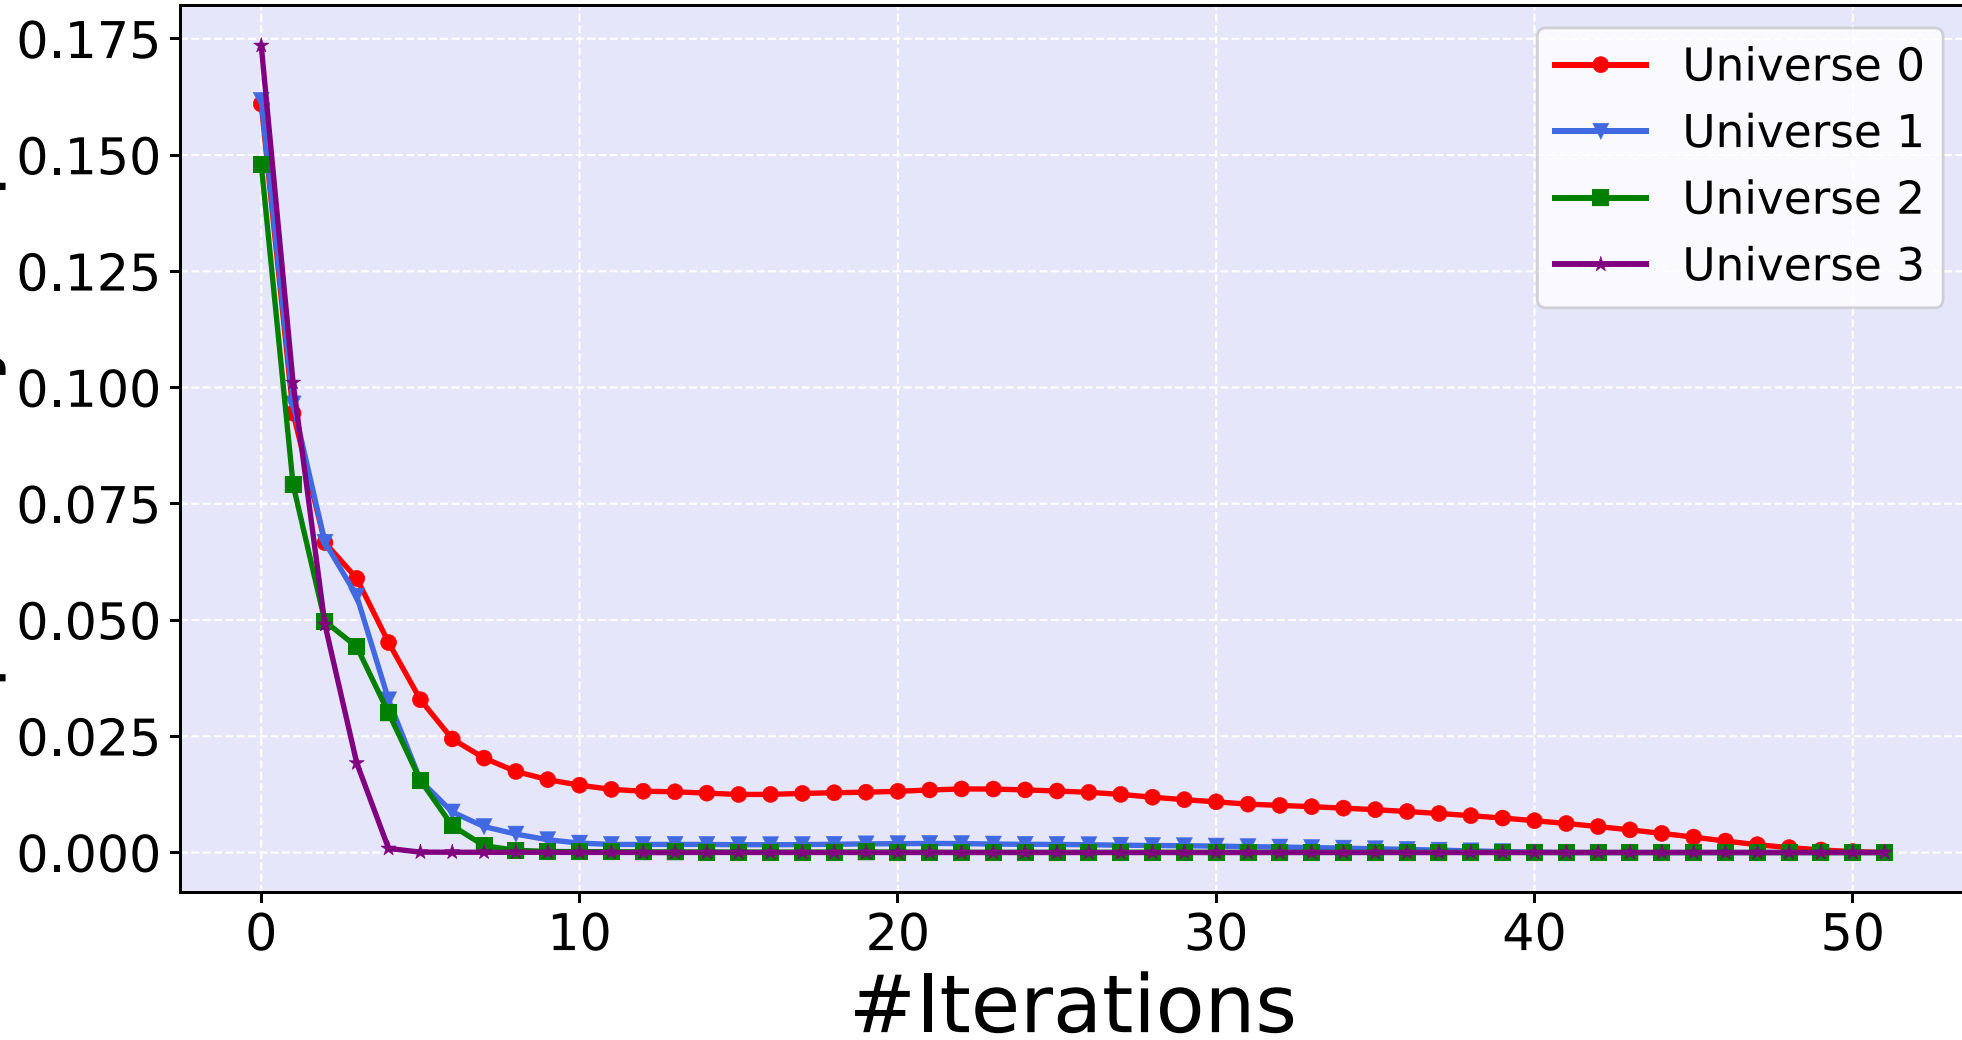

Supplement: supplementary_material [file attachment]



Supplement: supplementary_material [file attachment]

Optimality Gap

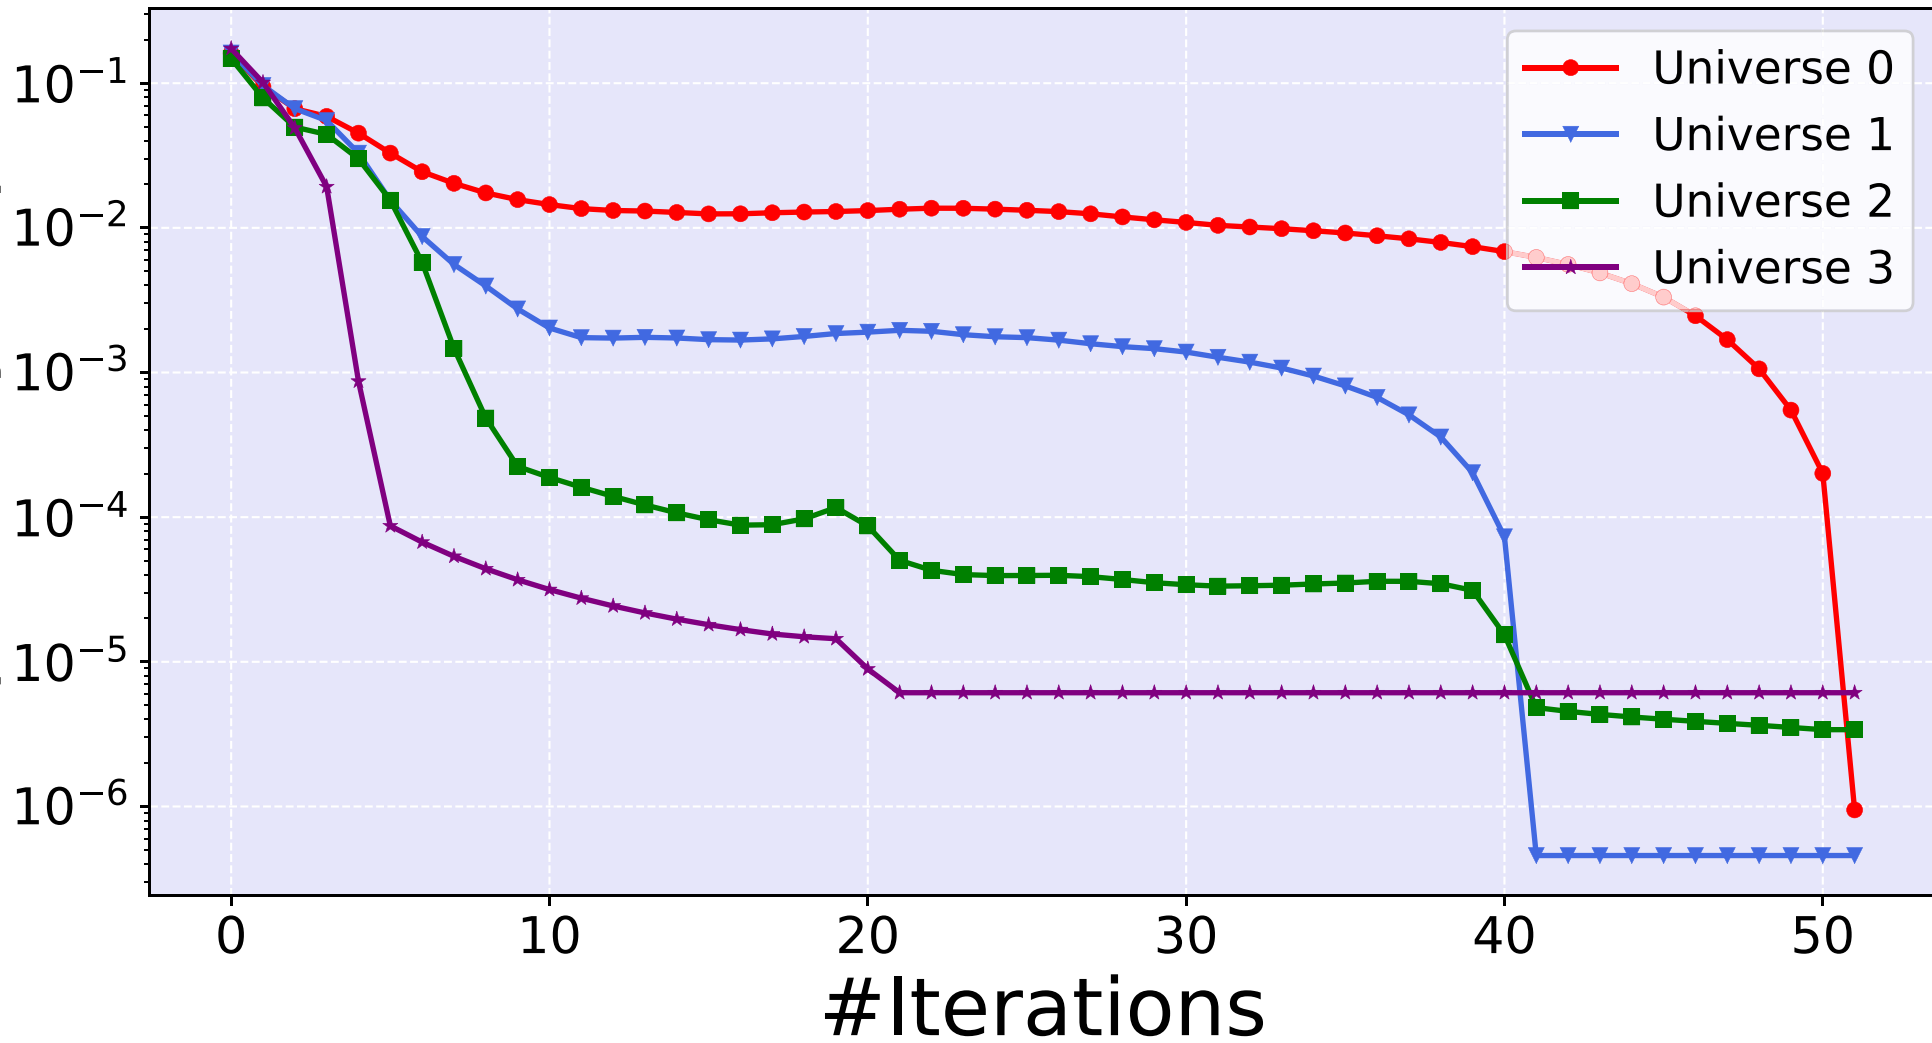

Supplement: supplementary_material [file attachment]

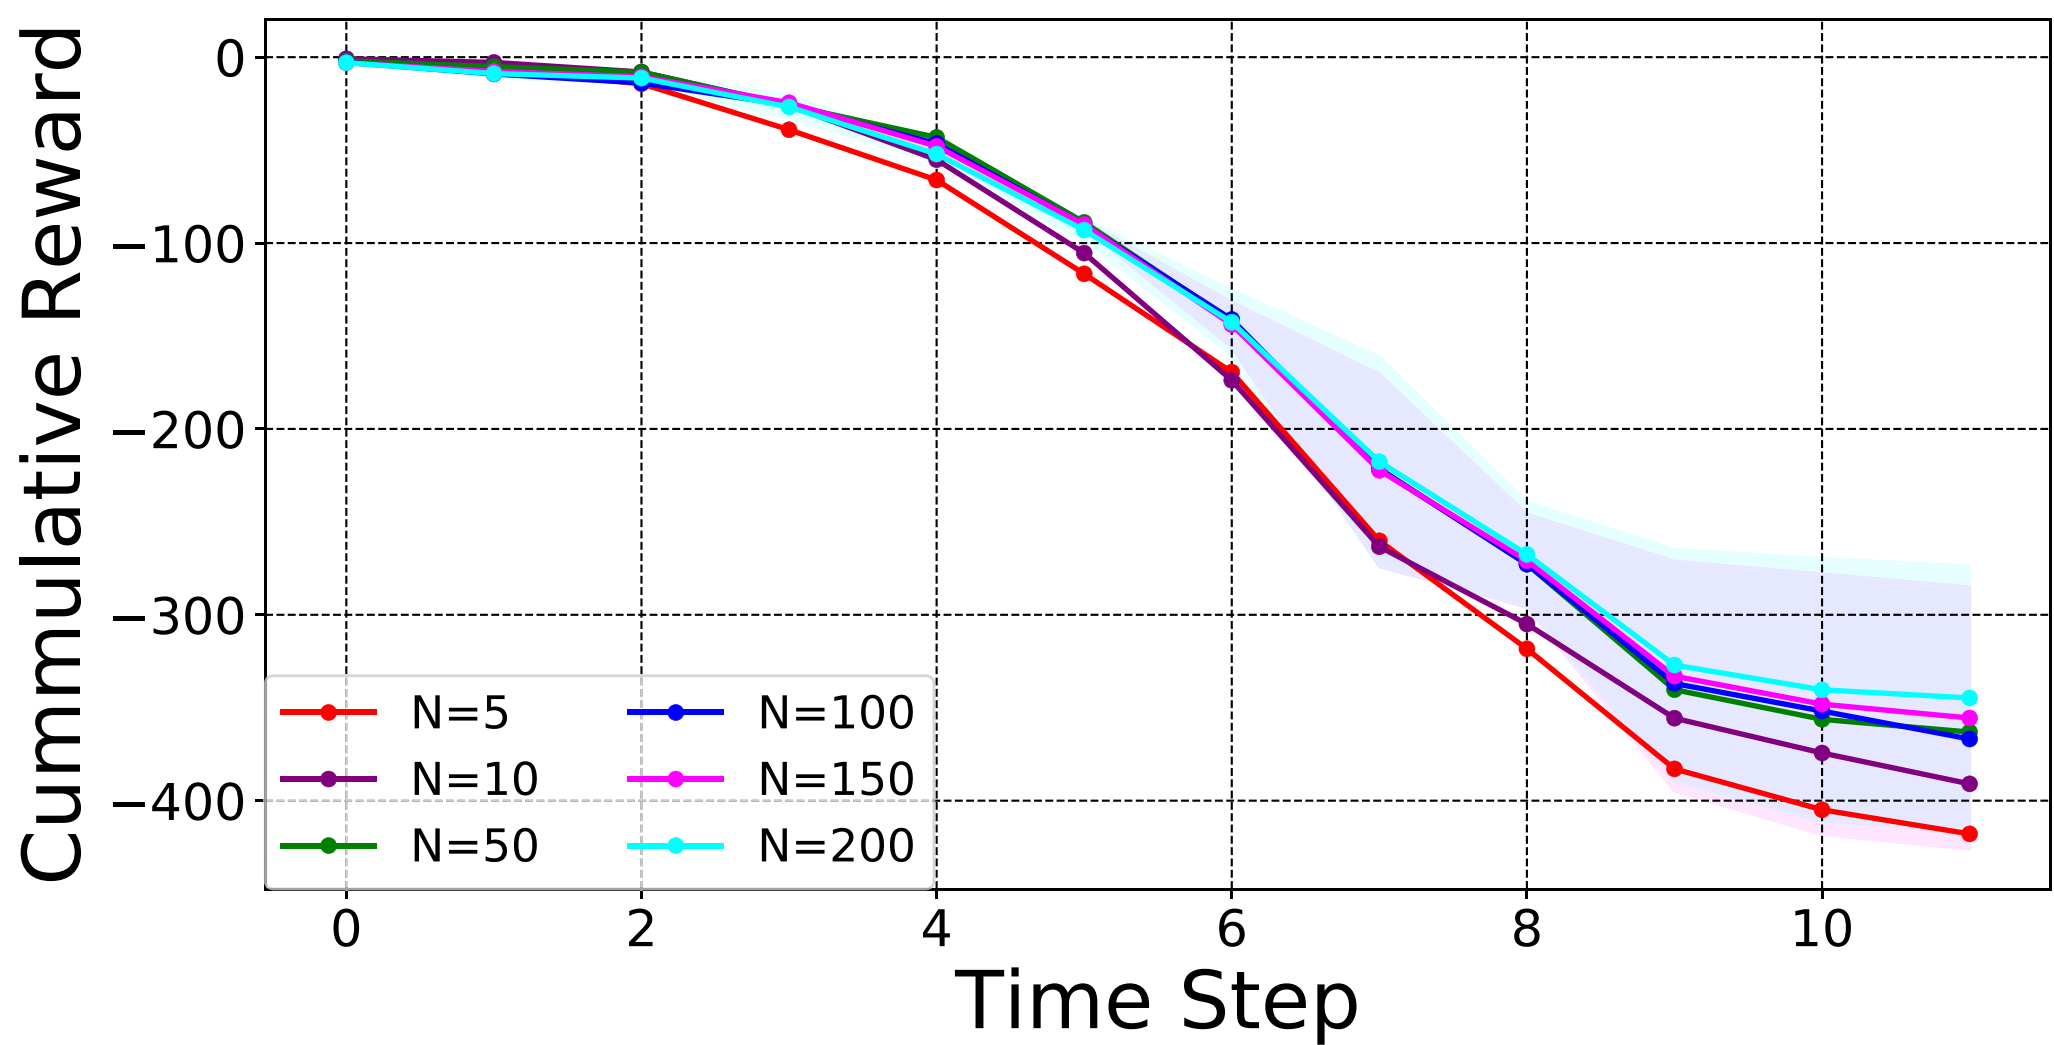

Supplement: supplementary_material [file attachment]

Return Value

Time Step

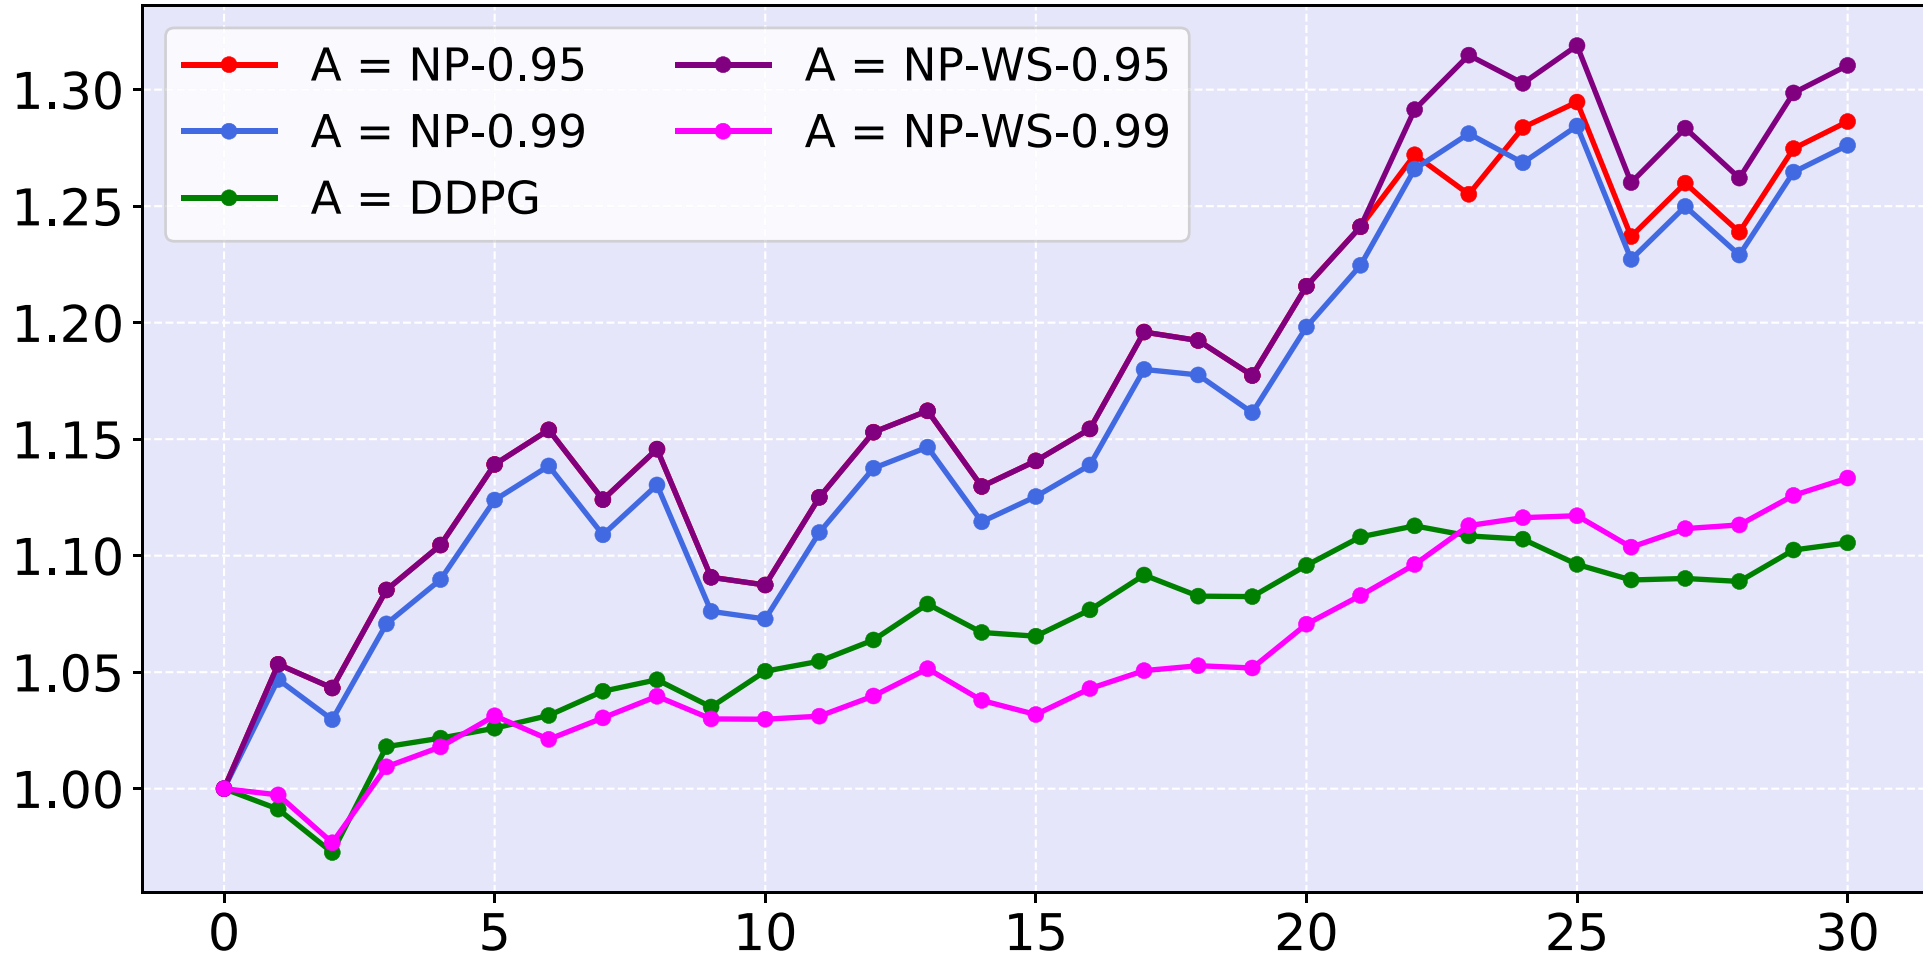

Supplement: supplementary_material [file attachment]

Optimality Gap

#Iterations

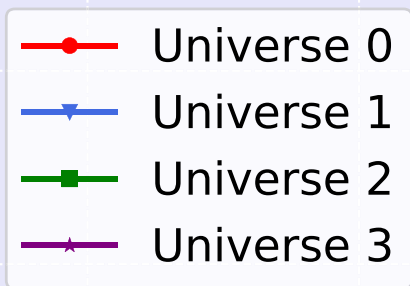

Supplement: supplementary_material [file attachment]
